# Supplementary material for: Effects of Chronic Inflammatory Activation of Murine and Human Arterial Endothelial Cells at Normal Lipoprotein and Cholesterol Levels In Vivo and In Vitro
Source: MDPI journal article supplement (doi:10.3390/cells13090773), 2024-04-30
Supplement: s1 [file s1]

# Effects of chronic inflammatory activation of murine and human arterial endothelial cells at normal lipoprotein and cholesterol levels in vivo and in vitro

Marion Mussbacher, José Basílio, Barbora Belakova, Anita Pirabe, Elisabeth Ableitner, Manuel Campos-Medina and Johannes A. Schmid

|                                                                                                                                                                                                   |    |
|---------------------------------------------------------------------------------------------------------------------------------------------------------------------------------------------------|----|
| Supplementary Methods.....                                                                                                                                                                        | 1  |
| Supplementary Figure S1. Confirmatory data on the mouse model of arterial endothelial inflammation.....                                                                                           | 3  |
| Supplementary Figure S2. Confirmation of the transgene expression in the endothelial layer after inducing the Cre recombinase activity by tamoxifen injection into mice. ....                     | 4  |
| Supplementary Figure S3. Deconvolution of cell types from aorta samples using CIBERSORTx ...                                                                                                      | 5  |
| Supplementary Figure S4. Network analysis of differentially regulated genes after inflammatory activation of endothelial cells, which have roles in Coronavirus infection pathways.....           | 6  |
| Supplementary Figure S5: ACE2 expression in HUVECs upon inflammatory activation .....                                                                                                             | 6  |
| Suppl. Figure S6: Apoptosis in HUVECs .....                                                                                                                                                       | 7  |
| Suppl. Figure S7: Transcriptomic changes of HUVECs after short (5h) and long-term (9d) treatment with TNF $\alpha$ .....                                                                          | 8  |
| Suppl. Figure S8: Pathway analysis of differentially expressed genes in isolated human endothelial cells after prolonged treatment with TNF $\alpha$ : .....                                      | 9  |
| Suppl. Figure S9: Re-analysis of the dataset GSE77962 for ACE2 expression .....                                                                                                                   | 10 |
| Suppl. Table S1: Comparison of the effects of endothelial caIKK2 expression in murine aortas of ApoE wild-type or knock-out background.....                                                       | 11 |
| Suppl. Table S2: All biological functions altered in murine aortas after inflammatory activation of endothelial cells on ApoE-wild-type background as assessed by Ingenuity Pathway Analysis .... | 13 |

## Supplementary Methods

### *Immuno-staining of murine aortas for transgene expression*

Cre-negative and BMX-CreERT2-positive mice harboring the floxed-stop-caIKK2-IRES-GFP transgene were injected on 5 consecutive days with tamoxifen as described in the main Methods section. Aortas were isolated by microscope-assisted dissection, perfusion-fixed with 4% paraformaldehyde, followed by dehydration and paraffination according to standard procedure. Paraffin-embedded tissue was cut

by a microtome to 4  $\mu\text{m}$  thick sections and placed on cover slips. Sections were heated in a dry oven at 90°C for 10 min, followed by standard de-paraffination and rehydration.

Antigen retrieval was performed in a boiling solution of 2mM Citric acid, 9mM Trisodium Citrate (pH 6.0), and 0.01% v/v Tween20 buffer for 10 min, and incubated in the same buffer for 30 min without the heat source. After the incubation time, the slides were rinsed using cold tap water.

For the immunostaining of the GFP, which is expressed from the transgene downstream of an internal ribosomal entry site (IRES), the areas enclosing the aortae were circled with a hydrophobic pen (DAIDO SANGYO, Tokyo, Japan). The sections were washed twice, for 5 min each time, with TBS + 0.025% v/v Tween 20 and each section was incubated with a blocking buffer consisting of TBS + 0.025% v/v Tween20 + 3% BSA for 60 mins. After shaking off the blocking solution, the anti-GFP antibody solution (TBS + 0.025% v/v Tween20 + 3% BSA) was applied. The GFP antibody (rabbit IgG, Santa Cruz Biotechnology, Dallas, U.S.A., SC-8334) was used according to the manufacturer guidelines, which suggested a 1:250 dilution and incubation overnight at 4°C. Slides were washed three times for 10 min with TBS + 0.025% v/v Tween 20. Thereafter, the sections were incubated for 60 min at room temperature with a secondary antibody solution consisting of a TBS + 0.025% v/v Tween20 + 3% BSA buffer. The secondary antibody, linked to a Dylight 650 fluorophore, was issued in a 1:250 dilution, according to the manufacturer recommendations (Thermo Fisher Goat-anti-rabbit IgG #84546). The slides were washed twice in TBS, 10 min each time. The slides were mounted using a 125 g/L glycerin solution. Finally, the edges of the slide were sealed with nail polish.

Imaging was done with an Olympus BX61VS slide scanner (Tokyo, Japan), equipped with an Olympus XM10 camera, an Olympus BX – UCB motorized controller, and an XCT10A light 200W Mercury lamp (Massachusetts, U.S.A., Lumen Dynamics Group Inc.). The setup was controlled by the VS-ASW-S6 2.6 / VS-FLUO 2.9 Olympus software. Two images were taken for each aorta section, one image using the FITC configuration (capturing the autofluorescence of the internal elastic lamina), and the remaining image was taken using the Cy5 configuration.

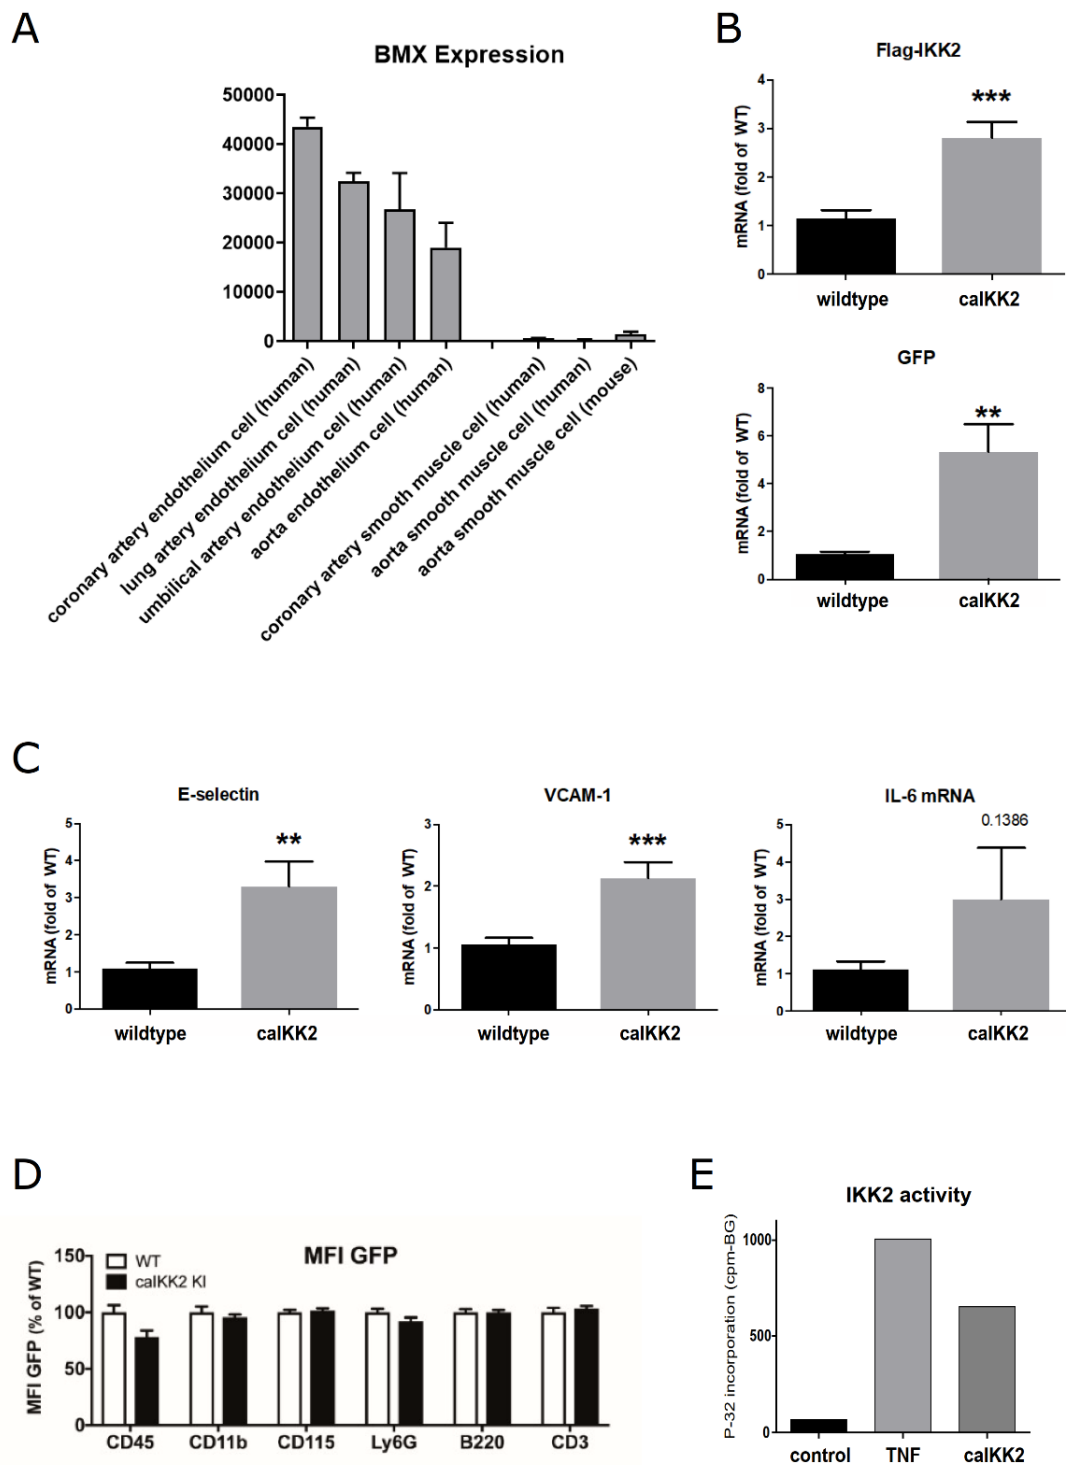

**Supplementary Figure S1. Confirmatory data on the mouse model of arterial endothelial inflammation**

A) Genevestigator database expression values for the BMX gene in various cell types as indicated (expression in endothelial but not in smooth muscle cells). B) Confirmation of the transgene expression (Flag-tagged constitutive active IKK2 and co-expressed GFP downstream of the IRES site) as assessed by reverse transcription-qPCR. C) Upregulation of inflammatory genes (E-selectin, VCAM-1 and IL-6)

in aortas expressing caIKK2. D) Lack of transgene expression in leukocytes of transgene mice (caIKK2 knock-in): Mean fluorescence intensity (MFI) of GFP is plotted compared to a wild-type (WT) control. E) IKK2 kinase activity of cells treated with TNF $\alpha$  and cells expressing the caIKK2 transgene as compared to control cells (as determined by a peptide kinase assay using the cognate I $\kappa$ B substrate peptide).

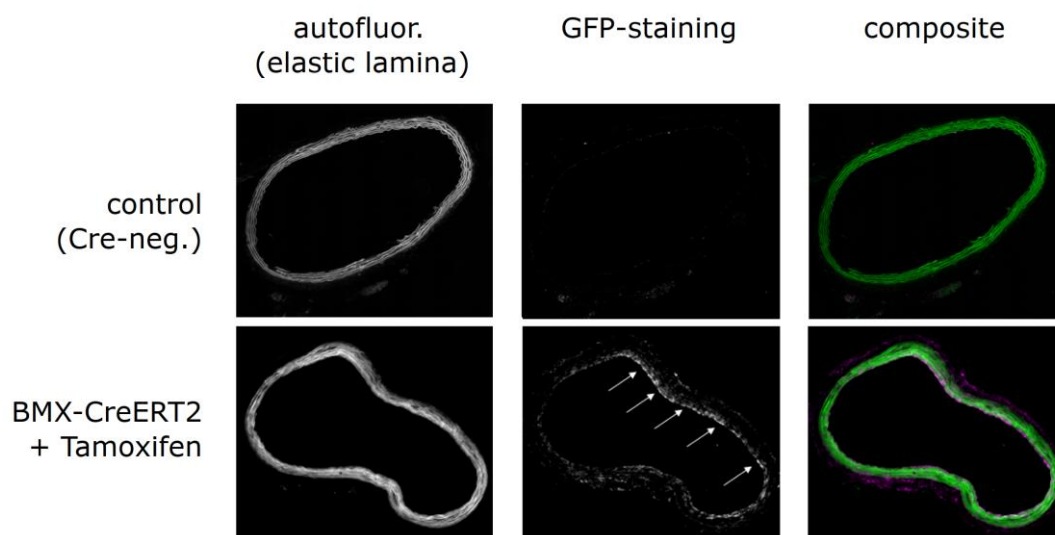

**Supplementary Figure S2. Confirmation of the transgene expression in the endothelial layer after inducing the Cre recombinase activity by tamoxifen injection into mice.**

Cre-negative control mice and BMX-CreERT2-positive mice (both containing the caIKK2-IRES-GFP transgene downstream of a loxP-flanked stop cassette) were injected five times (on 5 consecutive days) with tamoxifen as specified in the main Methods section, followed by isolation of aortae on day 10, fixation and paraffination. Paraffin sections were stained with anti-GFP antibodies (because intrinsic GFP fluorescence is lost by the paraffination procedure) and secondary antibodies coupled with a red-fluorescent dye (shown in magenta in the composite images). The internal elastic lamina (IEL) has a strong autofluorescence in the green channel – and serves as localization marker to specify the luminal side of the aorta. Endothelial cells are located on the inner side, while smooth muscle cells are outside of the IEL.



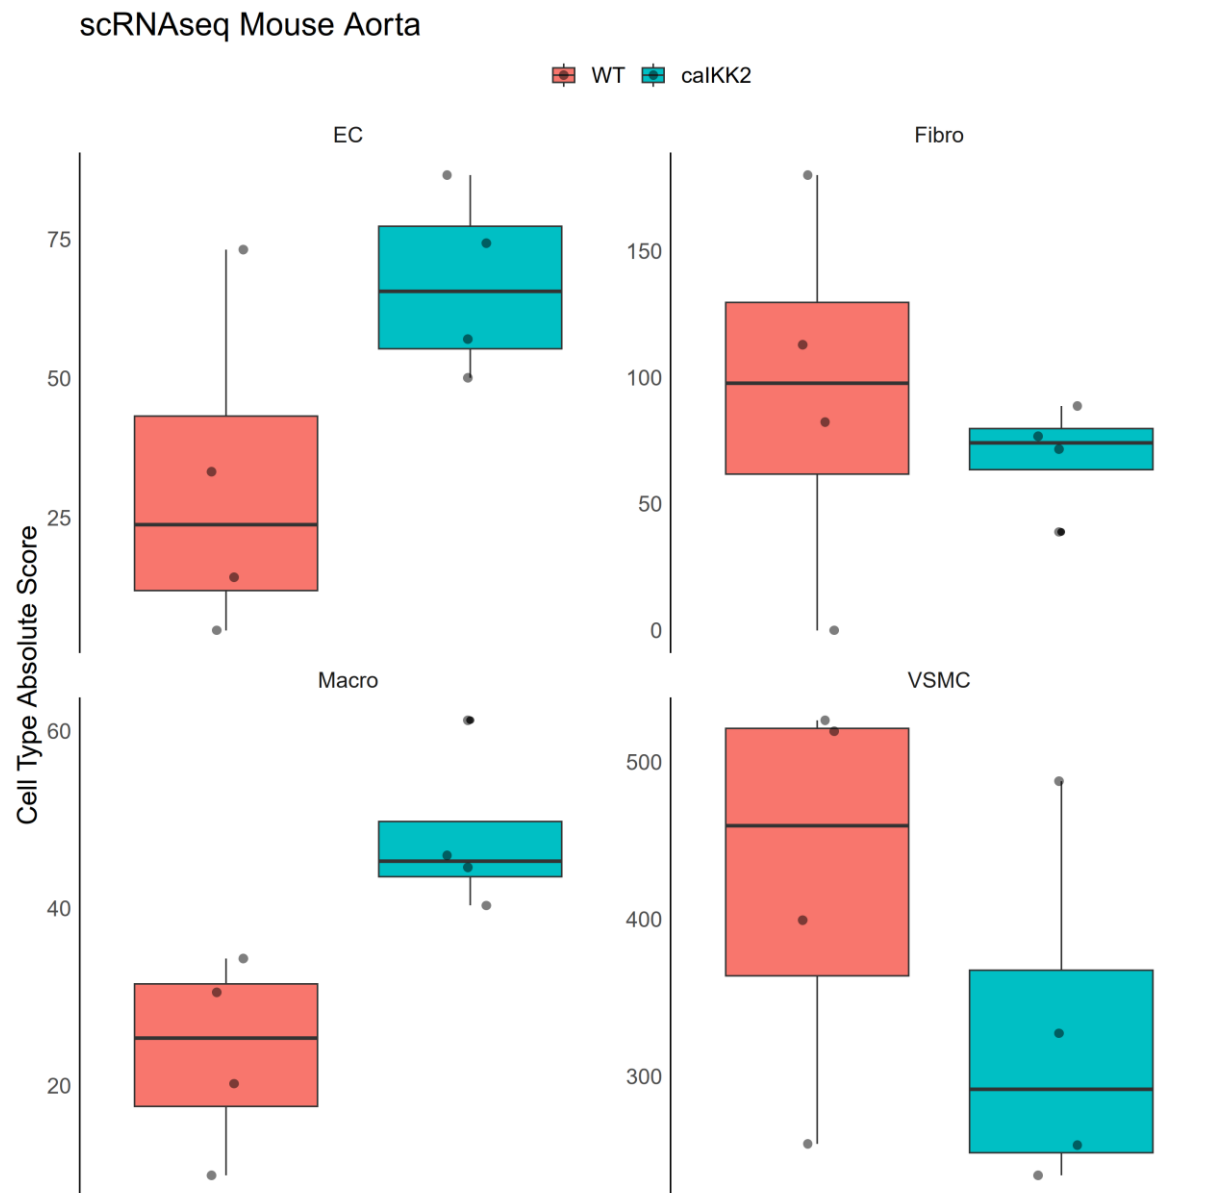

**Supplementary Figure S3. Deconvolution of cell types from aorta samples using CIBERSORTx**

Cell type signatures were determined for aortas from wild-type (WT) and transgene (calKK2) mice with the "Impute Cell Fractions" module of CIBERSORTx, using the batch correction S-mode, in run mode absolute. All input files were in transcripts per million (tpm). Changes in cell profile expression upon endothelial calKK2 expression are shown for endothelial cells (EC), macrophages (Macro), fibroblasts (Fibro) and vascular smooth muscle cells (VSMC).

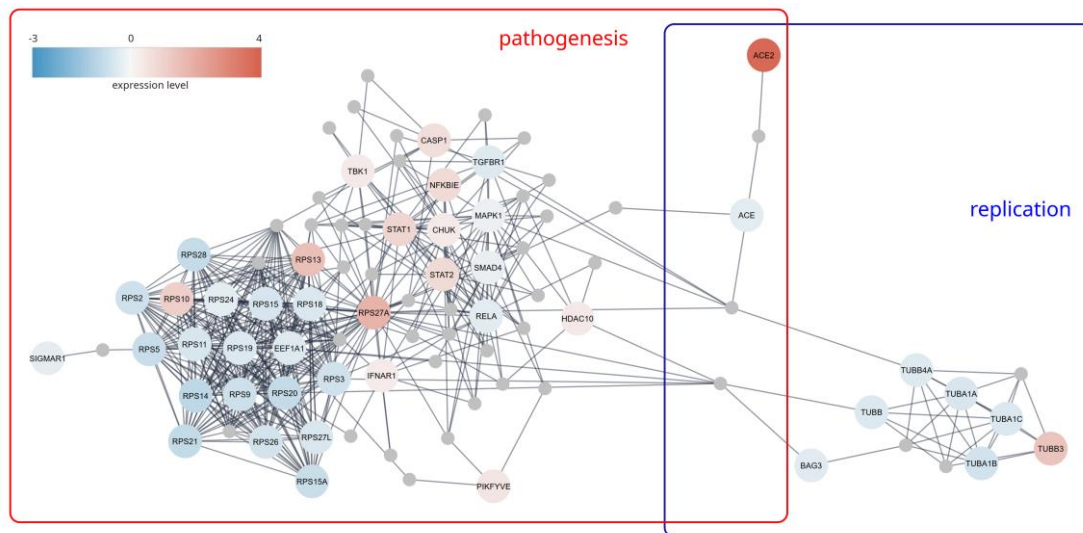

**Supplementary Figure S4. Network analysis of differentially regulated genes after inflammatory activation of endothelial cells, which have roles in Coronavirus infection pathways.**

Gene sets for *Coronavirus pathogenesis* (from Ingenuity Pathway Analysis) and for *Coronavirus replication* were uploaded separately to the *NetworkAnalyst* platform together with the expression levels of differentially regulated genes. The minimum *STRING* interactome networks that links these genes was computed for both gene sets. The resulting networks were downloaded as *graphml*-files and imported into the *Cytoscape* environment, where they were merged and analyzed for their overlap. ACE2, the highest upregulated gene upon inflammatory stimulation of arterial endothelial cells belongs to both pathways. Many of the virus pathogenesis genes are upregulated (in particular those, which have roles in inflammation) with the exception of several ribosomal protein genes. Genes of the replication pathway comprising mostly tubulin genes, important for transport and secretion of viral particles, were mostly downregulated (except for beta-tubulin).

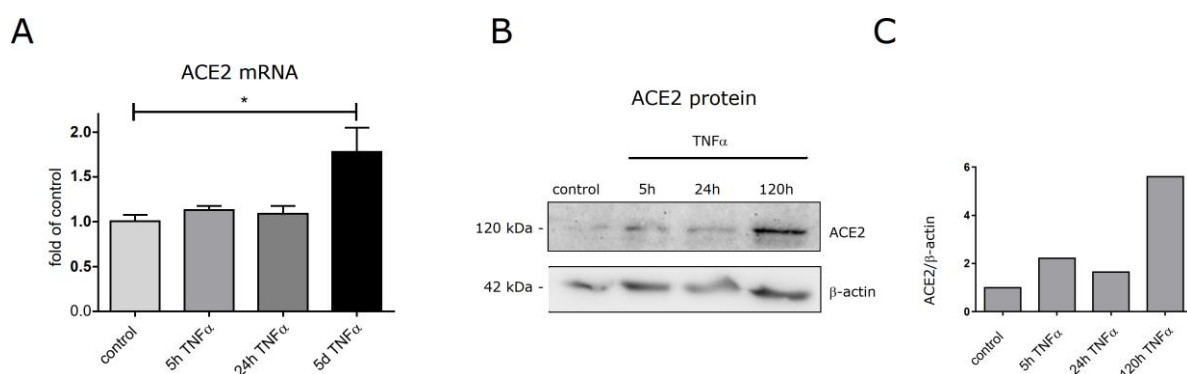

**Supplementary Figure S5: ACE2 expression in HUVECs upon inflammatory activation**

Human umbilical vein endothelial cells (HUVECs) were treated for different periods of time with TNF $\alpha$  (50 ng/ml), followed by RNA and protein extraction. A) RNA was reversed transcribed and ACE2 mRNA measured via quantitative PCR. B) Proteins were separated by SDS-PAGE and subjected to Western Blot analysis for ACE2 and  $\beta$ -actin protein expression. C) Quantification of the normalized ACE2 expression as shown in B) by densitometry. D), E) Quantification of late apoptotic/necrotic HUVECs treated with TNF $\alpha$ : HUVECs were treated with TNF $\alpha$  (50 ng/ml) for 5 days, trypsinized and stained with a cell death detection kit to assess Annexin V-binding, as well as uptake of 7-AAD by

permeable cells using flow cytometry. Late apoptotic/necrotic cells are positive for Annexin V as well as 7-AAD as indicated by the gates in the density plots (D). E) Quantification of these cells and statistical comparison (Students t-test,  $n=3$ ).

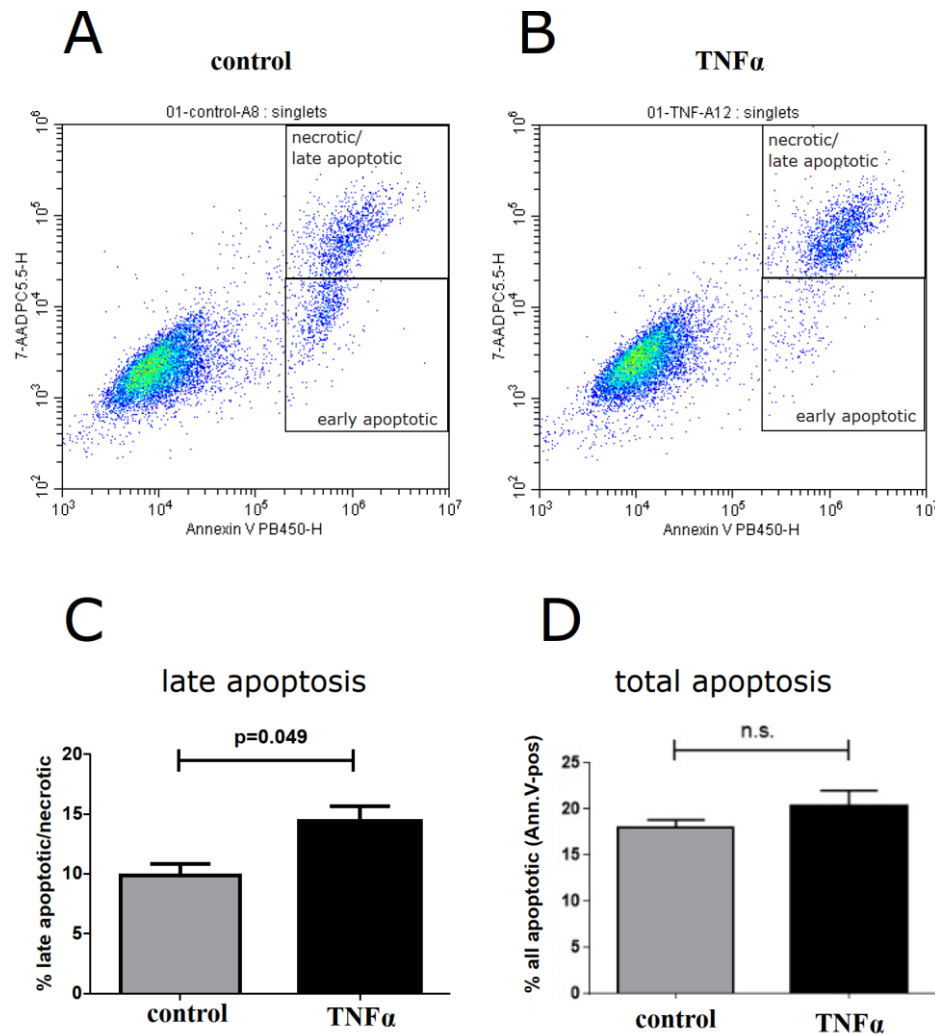

#### Suppl. Figure S6: Apoptosis in HUVECs

Isolated primary HUVECs were treated for 5 days with TNF $\alpha$  and the percentage of apoptotic cells (comprising early as well as late apoptosis/necrosis) was assessed in comparison to control cells using flow cytometry analysis of Annexin-V binding.

A

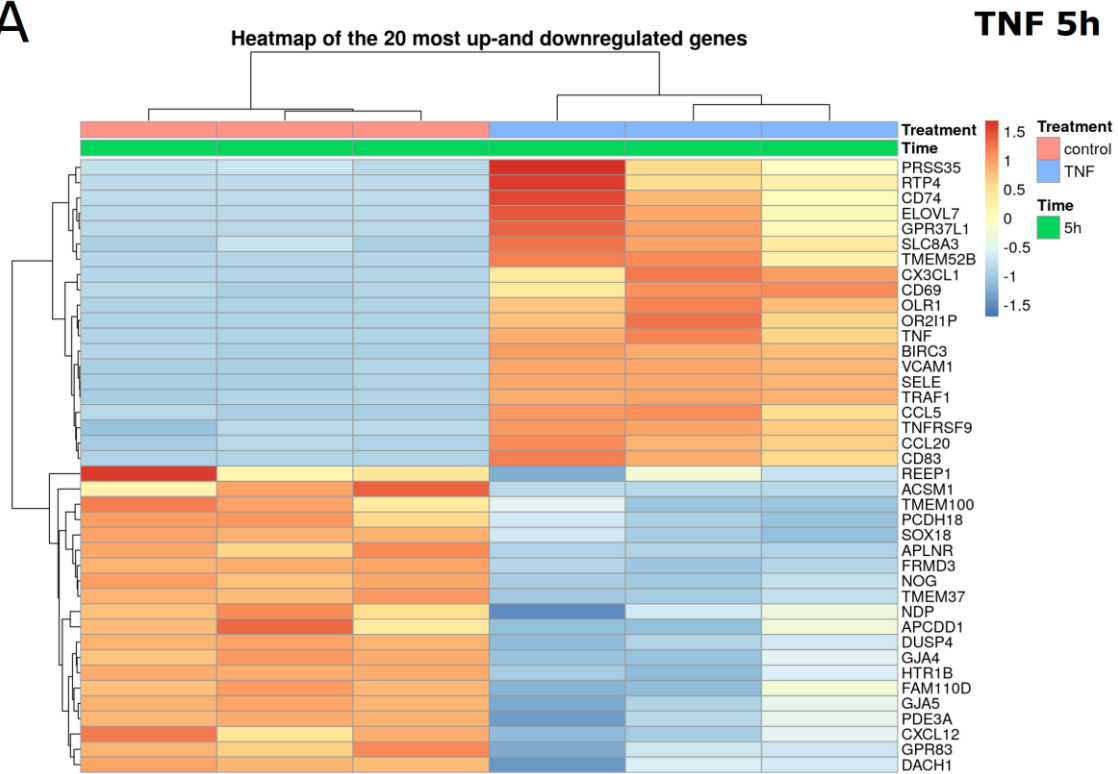

B

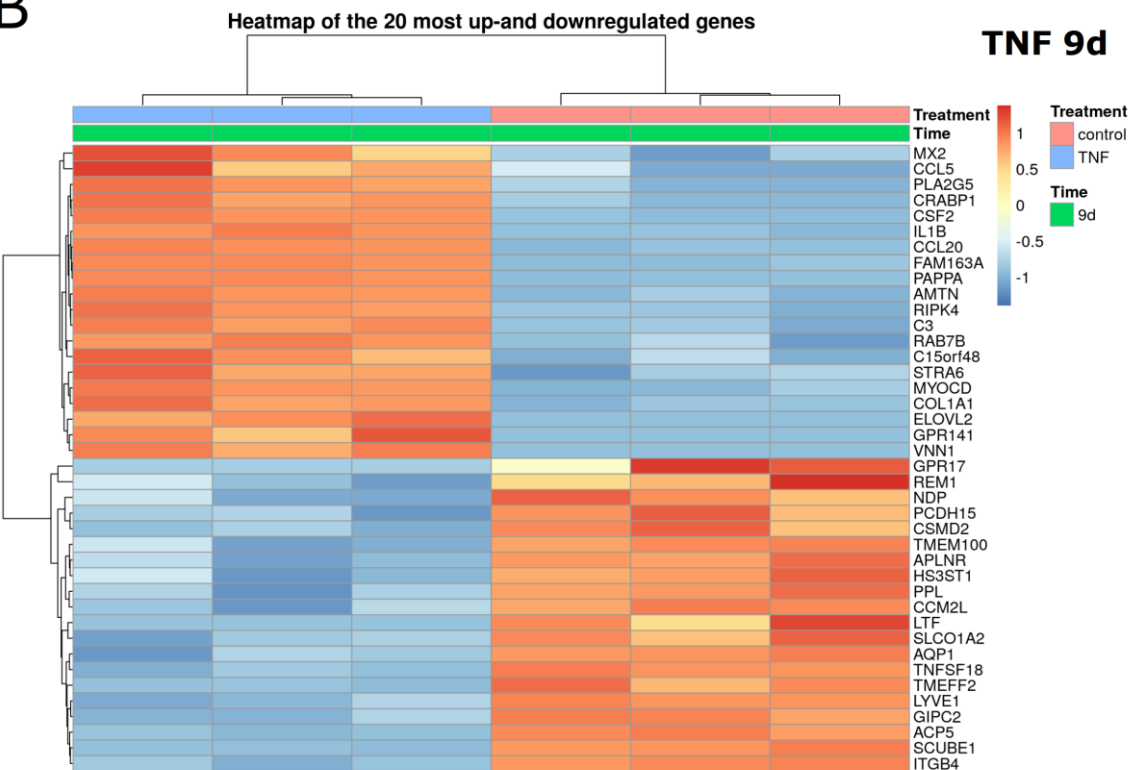

Suppl. Figure S7: Transcriptomic changes of HUVECs after short (5h) and long-term (9d) treatment with TNF $\alpha$

A

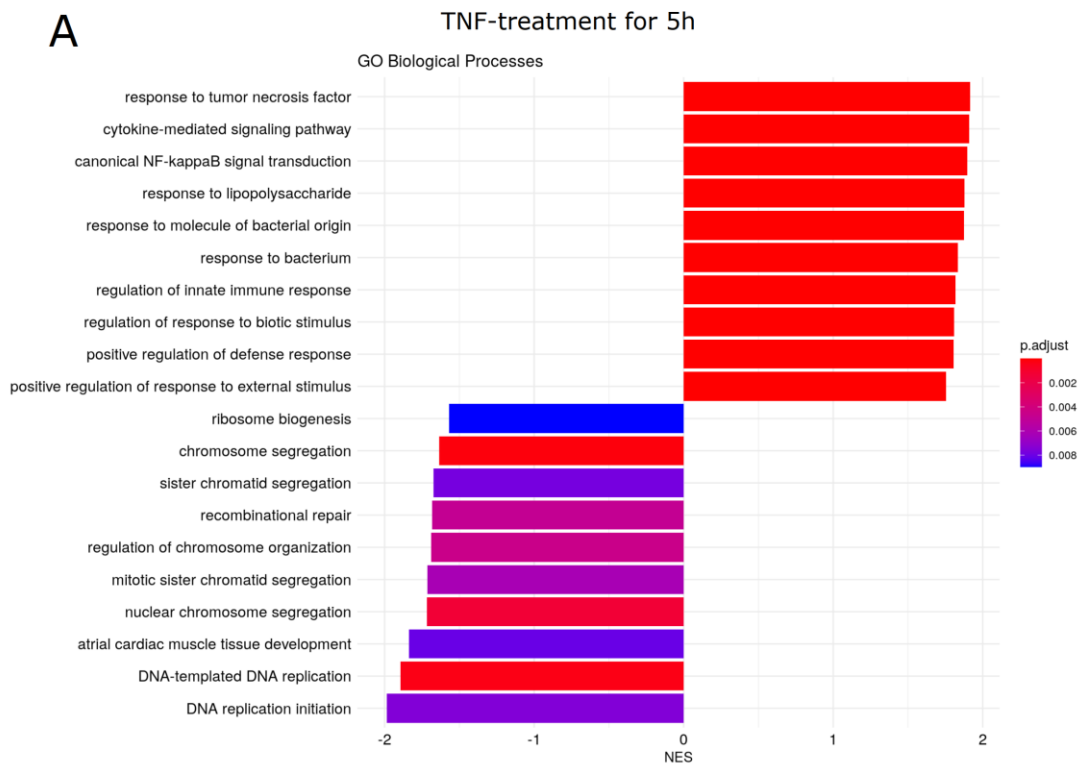

B

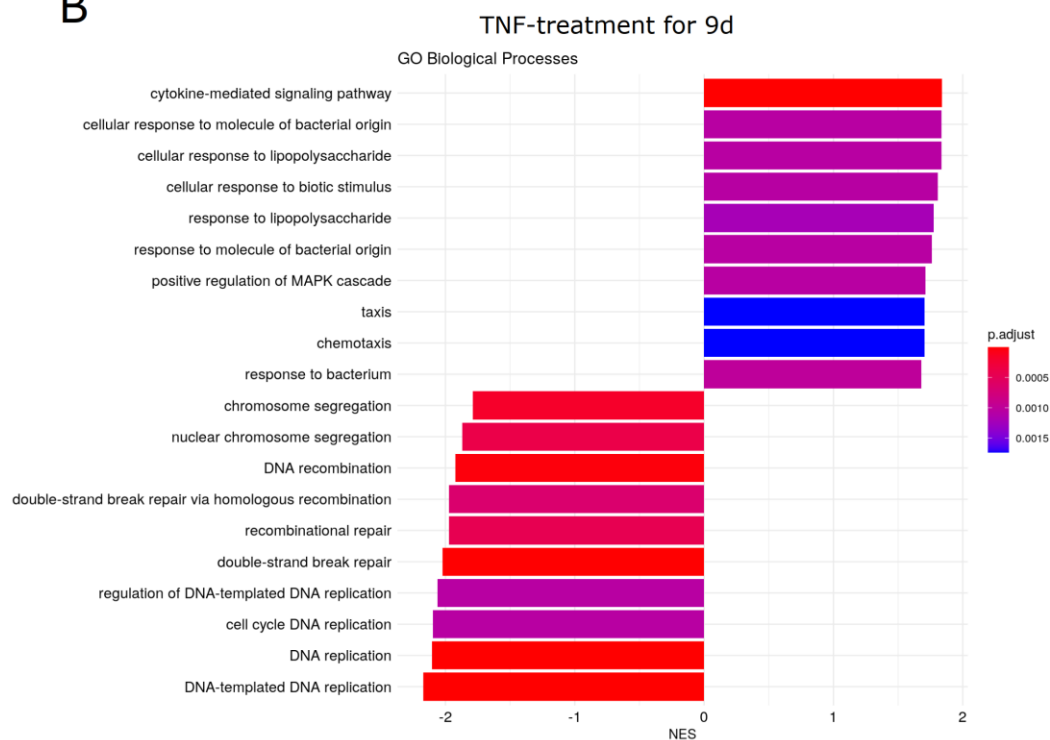

**Suppl. Figure S8: Pathway analysis of differentially expressed genes in isolated human endothelial cells after prolonged treatment with TNF $\alpha$ :**

HUVECs were treated for 5h or 9d with TNF $\alpha$  (50 ng/ml), followed by RNA extraction, sequencing and gene set enrichment analysis using the gene ontology of biological processes (n=3 for the different conditions).

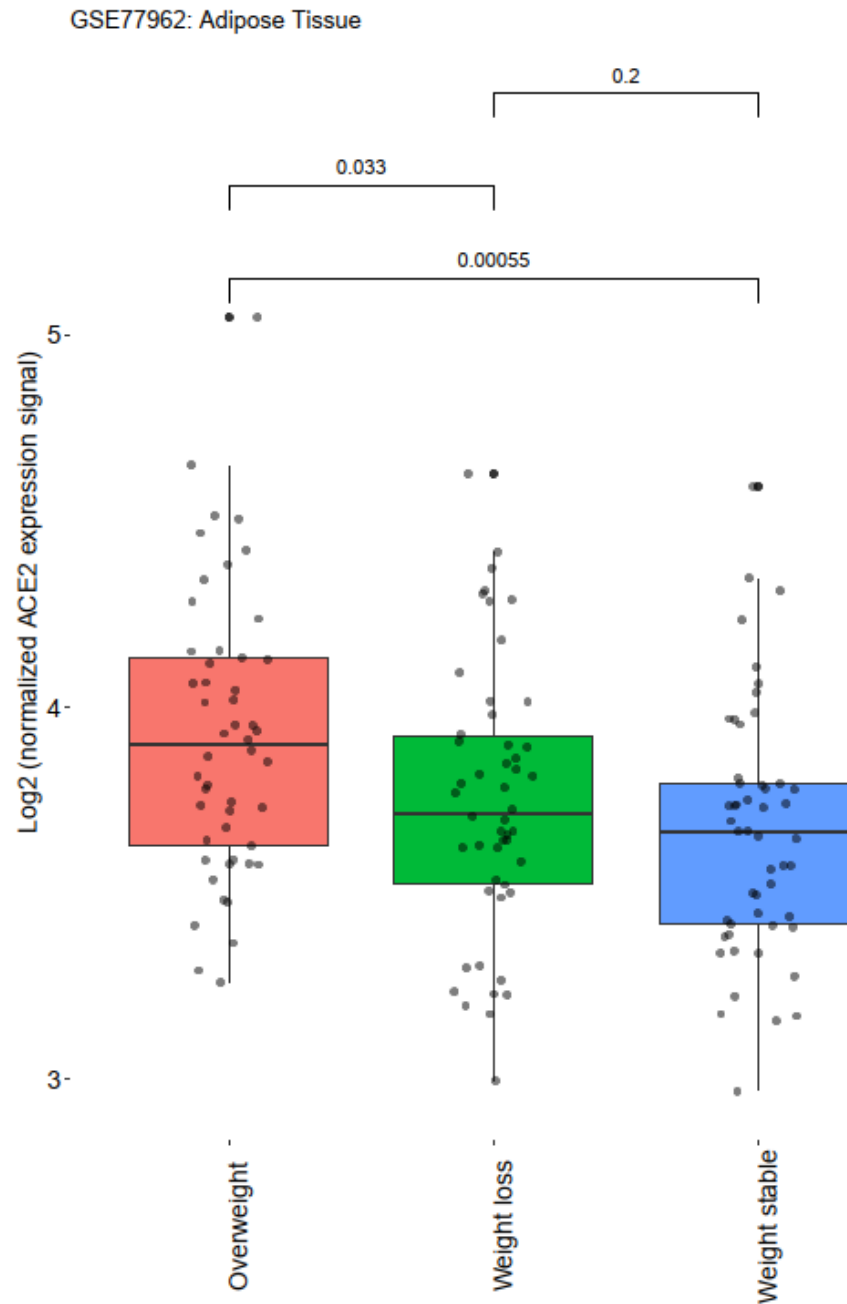

**Suppl. Figure S9: Re-analysis of the dataset GSE77962 for ACE2 expression**

ACE2 levels are highest in overweight humans, decline with weight loss and are lowest at a stable reduced weight (reference 30).

**Suppl. Table S1: Comparison of the effects of endothelial calKK2 expression in murine aortas of ApoE wild-type or knock-out background**

| calKK2 on ApoE wildtype |       |           |                                                     | calKK2 on ApoE KO |        |             |                                                                 |
|-------------------------|-------|-----------|-----------------------------------------------------|-------------------|--------|-------------|-----------------------------------------------------------------|
| Symbols                 | logFC | adj.P.Val | Name                                                | Symbols           | logFC  | adj.P.Val   | Name                                                            |
| ACE2                    | 3.761 | 9.15E-15  | angiotensin I converting enzyme 2                   | Robo2             | 1.9736 | 6.0304E-10  | roundabout guidance receptor 2                                  |
| CORIN                   | 3.196 | 1.04E-02  | corin, serine peptidase                             | Ace2              | 1.8995 | 3.1442E-07  | angiotensin I converting enzyme (peptidyl-dipeptidase A) 2      |
| Serpina3g               | 2.594 | 8.15E-04  | Ser (or Cyst) peptidase inhibitor, clade A, memb 3G | Serpina3f         | 1.705  | 0.000045798 | "serine (or cysteine) peptidase inhibitor, clade A, member 3F"  |
| GBP6                    | 2.249 | 6.40E-06  | guanylate binding protein family member 6           | Gal               | 1.4617 | 0.00078753  | galanin and GMAP prepropeptide                                  |
| CXCL10                  | 2.083 | 7.73E-03  | C-X-C motif chemokine ligand 10                     | Serpina3g         | 1.4156 | 0.00025261  | "serine (or cysteine) peptidase inhibitor, clade A, member 3G"  |
| Clec2d                  | 1.957 | 9.14E-08  | C-type lectin domain family 2, member d             | Serpina3i         | 1.3828 | 0.0010845   | "serine (or cysteine) peptidase inhibitor, clade A, member 3I"  |
| RPS27A                  | 1.794 | 6.01E-05  | ribosomal protein S27a                              | Grem1             | 1.3744 | 0.00050877  | "gremlin 1, DAN family BMP antagonist"                          |
| Cxcl9                   | 1.751 | 2.24E-03  | chemokine (C-X-C motif) ligand 9                    | Cd55              | 1.3645 | 0.00023661  | "CD55 molecule, decay accelerating factor for complement"       |
| IGSF1                   | 1.738 | 2.38E-02  | immunoglobulin superfamily member 1                 | Abca13            | 1.3414 | 0.0022635   | "ATP-binding cassette, sub-family A (ABC1), member 13"          |
| CIITA                   | 1.658 | 1.56E-02  | class II major histocompatibility complex transact. | Gpr171            | 1.3132 | 0.00032853  | G protein-coupled receptor 171                                  |
| SBK2                    | 1.657 | 3.07E-02  | SH3 domain binding kinase family member 2           | Cyp4f18           | 1.3003 | 0.0021674   | "cytochrome P450, family 4, subfamily f, polypeptide 18"        |
| GBP5                    | 1.507 | 3.64E-03  | guanylate binding protein 5                         | Lrrn3             | 1.257  | 0.0060936   | "leucine rich repeat protein 3, neuronal"                       |
| CD55                    | 1.499 | 6.34E-08  | CD55 molecule (Cromer blood group)                  | Spdl1             | 1.2397 | 0.00024859  | spindle apparatus coiled-coil protein 1                         |
| TNFSF10                 | 1.468 | 5.15E-08  | TNF superfamily member 10                           | Il18rap           | 1.2263 | 0.0014373   | interleukin 18 receptor accessory protein                       |
| RPS13                   | 1.451 | 3.21E-04  | ribosomal protein S13                               | Prss30            | 1.2111 | 0.0033176   | "protease, serine 30"                                           |
| CD274                   | 1.392 | 6.43E-03  | CD274 molecule                                      | Doc2b             | 1.2076 | 0.0010845   | "double C2, beta"                                               |
| HLA-A                   | 1.386 | 5.84E-05  | major histocompatibility complex, class I, A        | Mmp13             | 1.2072 | 0.001086    | matrix metalloproteinase 13                                     |
| Tgtp1/Tgtp2             | 1.367 | 2.44E-02  | T cell specific GTPase 1                            | Dmp1              | 1.2047 | 0.0099473   | dentin matrix protein 1                                         |
| TUBB3                   | 1.347 | 2.79E-02  | tubulin beta 3 class III                            | Mefv              | 1.1897 | 0.0001645   | Mediterranean fever                                             |
| IL2RG                   | 1.321 | 2.30E-04  | interleukin 2 receptor subunit gamma                | Mir155hg          | 1.1888 | 0.01058     | Mir155 host gene (non-protein coding)                           |
| CCNL1                   | 1.281 | 4.61E-10  | cyclin L1                                           | Serpina3n         | 1.1444 | 0.000026197 | "serine (or cysteine) peptidase inhibitor, clade A, member 3N"  |
| NOD2                    | 1.237 | 8.37E-06  | nucleotide binding oligomer. domain containing 2    | Spint1            | 1.1418 | 0.00032853  | "serine protease inhibitor, Kunitz type 1"                      |
| NLRCS                   | 1.236 | 1.06E-02  | NLR family CARD domain containing 5                 | B3gnt3            | 1.1338 | 0.001126    | "UDP-GlcNAc:betaGal beta-1,3-N-acetylglucosaminyltransferase 3" |
| TCIM                    | 1.232 | 3.74E-03  | transcriptional and immune response regulator       | Ercc6l            | 1.1326 | 0.0015462   |                                                                 |
| DNAJC28                 | 1.195 | 1.06E-02  | DnaJ heat shock protein family (Hsp40) member C28   | Atp8b4            | 1.1313 | 0.00010188  | "ATPase, class I, type 8B, member 4"                            |

| calKK2 on ApoE wildtype |        |           |                                                     | calKK2 on ApoE KO |         |           |                                                                     |
|-------------------------|--------|-----------|-----------------------------------------------------|-------------------|---------|-----------|---------------------------------------------------------------------|
| Symbols                 | logFC  | adj.P.Val | Name                                                | Symbols           | logFC   | adj.P.Val | Name                                                                |
| SCX                     | -0.77  | 4.40E-02  | scleraxis bHLH transcription factor                 | Trnp1             | -1.0423 | 0.0057612 | TMF1-regulated nuclear protein 1                                    |
| RPS5                    | -0.773 | 2.66E-07  | ribosomal protein S5                                | 5430431A17Rik     | -1.0477 | 0.025495  | RIKEN cDNA 5430431A17 gene                                          |
| ATF5                    | -0.774 | 3.97E-10  | activating transcription factor 5                   | Smim5             | -1.0517 | 0.0016514 | small integral membrane protein 5                                   |
| RPL37A                  | -0.782 | 1.82E-06  | ribosomal protein L37a                              | Lrrn1             | -1.0724 | 0.023821  | "leucine rich repeat protein 1, neuronal"                           |
| TRNP1                   | -0.799 | 1.25E-02  | TMF1 regulated nuclear protein 1                    | Sost              | -1.0732 | 0.004652  | sclerostin                                                          |
| TMEM45A                 | -0.805 | 1.60E-03  | transmembrane protein 45A                           | Ppp1r14c          | -1.0834 | 0.00546   | "protein phosphatase 1, regulatory inhibitor subunit 14C"           |
| RPS28                   | -0.812 | 1.51E-05  | ribosomal protein S28                               | Mir143            | -1.1041 | 0.020315  | microRNA 143                                                        |
| TMEM98                  | -0.813 | 4.01E-04  | transmembrane protein 98                            | Cck               | -1.122  | 0.0080187 | cholecystokinin                                                     |
| PERP                    | -0.82  | 2.07E-03  | p53 apoptosis effector related to PMP22             | Slc22a2           | -1.1309 | 0.014117  | "solute carrier family 22 (organic cation transporter), member 2"   |
| RBP1                    | -0.821 | 3.08E-04  | retinol binding protein 1                           | Adra2a            | -1.1322 | 0.0014748 | "adrenergic receptor, alpha 2a"                                     |
| TMEM160                 | -0.823 | 3.34E-04  | transmembrane protein 160                           | Mylk4             | -1.1365 | 0.0025078 | "myosin light chain kinase family, member 4"                        |
| Ppbp                    | -0.824 | 2.67E-02  | pro-platelet basic protein                          | Klk10             | -1.1593 | 0.010717  | kallikrein related-peptidase 10                                     |
| C1orf198                | -0.839 | 2.07E-02  | chromosome 1 open reading frame 198                 | Gja6              | -1.1628 | 0.0045197 | "gap junction protein, alpha 6"                                     |
| RPS20                   | -0.84  | 2.16E-07  | ribosomal protein S20                               | Col19a1           | -1.1733 | 0.0068681 | "collagen, type XIX, alpha 1"                                       |
| RPS21                   | -0.849 | 9.87E-08  | ribosomal protein S21                               | Cdh16             | -1.1803 | 0.010639  | cadherin 16                                                         |
| RPL39                   | -0.859 | 1.47E-06  | ribosomal protein L39                               | 4930417O22Rik     | -1.1817 | 0.0077992 | RIKEN cDNA 4930417O22 gene                                          |
| EFHD1                   | -0.881 | 2.87E-03  | EF-hand domain family member D1                     | Ky                | -1.1937 | 0.0012464 | kyphoscoliosis peptidase                                            |
| KRT18                   | -0.889 | 7.14E-05  | keratin 18                                          | Ncan              | -1.2095 | 0.0090516 | neurocan                                                            |
| TENT5B                  | -0.899 | 1.60E-02  | terminal nucleotidyltransferase 5B                  | Fam25c            | -1.2294 | 0.0083178 | "family with sequence similarity 25, member C"                      |
| KCNJ15                  | -0.937 | 1.60E-02  | potassium inwardly rectifying channel subfamily J15 | Kcnc4             | -1.2363 | 0.0055485 | "potassium voltage gated channel, Shaw-related subfamily, member 4" |
| RPS14                   | -0.944 | 1.04E-06  | ribosomal protein S14                               | Rab17             | -1.2706 | 0.0010468 | "RAB17, member RAS oncogene family"                                 |
| CREB3L1                 | -0.971 | 9.01E-05  | cAMP responsive element binding protein 3 like 1    | Casq1             | -1.3696 | 0.0005563 | calsequestrin 1                                                     |
| Rplp1                   | -1.012 | 8.38E-10  | ribosomal protein, large, P1                        | Ihh               | -1.4414 | 0.0005229 | Indian hedgehog                                                     |
| CLDN3                   | -1.1   | 4.57E-03  | claudin 3                                           | Slc22a1           | -1.4598 | 0.0004883 | "solute carrier family 22 (organic cation transporter), member 1"   |
| NPAS2                   | -1.274 | 2.18E-02  | neuronal PAS domain protein 2                       | Lsmem1            | -1.4844 | 0.0009313 | leucine-rich single-pass membrane protein 1                         |



Suppl. Table S2: All biological functions altered in murine aortas after inflammatory activation of endothelial cells on ApoE-wild-type background as assessed by Ingenuity Pathway Analysis

| Categories                                                                                             | Diseases or Functions Annotation               | p-value  | Predicted Activation State | Activation z-score | Molecules                                                                                                   | # Molecules |
|--------------------------------------------------------------------------------------------------------|------------------------------------------------|----------|----------------------------|--------------------|-------------------------------------------------------------------------------------------------------------|-------------|
| Protein Synthesis                                                                                      | Initiation of translation of protein           | 4,48E-22 |                            | 0,294              | AGO2, EIF2AK4, EIF2S2, EIF3E, EIF3F, EIF3H, EIF3I, EIF3K, EIF4A2, EIF4EBP2, EIF4F, FMR1, IMPACT, MTIF2, MYI | 56          |
| RNA Damage and Repair                                                                                  | Nonsense-mediated mRNA decay                   | 1,59E-18 |                            |                    | EIF3E, PPP2CA, PPP2R1A, RPL10, RPL12, RPL13, RPL14, RPL18, RPL18A, RPL22, RPL23, RPL26, RPL35, RPL35A, I    | 44          |
| Cancer, Cell Death and Survival, Organismal Injury and Abnormalities, Tumor Morphology                 | Cell death of osteosarcoma cells               | 9,06E-15 | Increased                  | 3,429              | CAPN6, CELA1, EEF1A1, EIF3E, EIF3F, HSPA9, NUP155, NUP214, PHF5A, PSMA5, PSMB1, PSMB5, RAN, RPL10, I        | 46          |
| Protein Synthesis                                                                                      | Translation                                    | 3,30E-14 |                            | -0,078             | AGO1, AGO2, AKAP8L, AKT1, ATF5, CHCHD1, CNBP, DHX9, EEF1A1, EEF1B2, EEF1D, EEF2, EIF2AK4, EIF2S2, EIF       | 96          |
| Protein Synthesis                                                                                      | Translation of protein                         | 4,22E-12 |                            | 0,656              | AGO1, AGO2, AKAP8L, AKT1, ATF5, CHCHD1, CNBP, DHX9, EEF1A1, EIF2AK4, EIF2S2, EIF3E, EIF3F, EIF3H, EIF3I,    | 89          |
| Protein Synthesis                                                                                      | Metabolism of protein                          | 5,21E-12 |                            | -1,613             | ACE, ACE2, ADAM12, ADRM1, AFG3L2, AGO1, AGO2, AHSF, AKAP8L, AKT1, AMFR, ANAPC10, ANAPC11, ATF5              | 237         |
| Protein Synthesis                                                                                      | Synthesis of protein                           | 1,10E-11 |                            | -1,35              | ADRM1, AGO1, AGO2, AKAP8L, AKT1, ATF5, BCR, CAV1, CDKN1B, CHCHD1, CIRBP, CNBP, CYP1B1, DHX9, EEF1A          | 125         |
| Protein Synthesis                                                                                      | Expression of protein                          | 4,93E-10 |                            | 0,33               | ADRM1, AGO1, AGO2, AKAP8L, AKT1, ATF5, BCR, CAV1, CDKN1B, CHCHD1, CNBP, DHX9, EEF1A1, EIF2AK4, EIF          | 97          |
| Cancer, Cell Death and Survival, Organismal Injury and Abnormalities                                   | Cell death of malignant tumor                  | 4,14E-08 | Increased                  | 3,255              | AFAP1L2, AIFM1, AKT1, AKT1S1, BAD, BCL2L1, BRD2, CAPN6, CASP1, CAT, Cdc42, CDKN1B, CELA1, EEF1A1, EIF       | 84          |
| Cancer, Cell Death and Survival, Organismal Injury and Abnormalities, Tumor Morphology                 | Necrosis of malignant tumor                    | 7,05E-08 | Increased                  | 3,255              | AFAP1L2, AIFM1, AKT1, AKT1S1, BAD, BCL2L1, BRD2, CAPN6, CASP1, CAT, Cdc42, CDKN1B, CELA1, EEF1A1, EIF       | 83          |
| Cancer, Cell Death and Survival, Organismal Injury and Abnormalities, Tumor Morphology                 | Cell death of cancer cells                     | 1,19E-07 | Increased                  | 3,255              | AFAP1L2, AIFM1, AKT1, AKT1S1, BAD, BCL2L1, BRD2, CAPN6, CASP1, CAT, Cdc42, CDKN1B, CELA1, EEF1A1, EIF       | 82          |
| Cancer, Cell Death and Survival, Organismal Injury and Abnormalities, Tumor Morphology                 | Cell death of tumor cells                      | 2,50E-07 | Increased                  | 3,27               | ADAM12, AFAP1L2, AIFM1, AKT1, AKT1S1, BAD, BCL2L1, BRD2, CAPN6, CASP1, CAT, CAV1, CCND3, CD274, C           | 94          |
| Cancer, Cell Death and Survival, Organismal Injury and Abnormalities                                   | Cell death of tumor                            | 2,89E-07 | Increased                  | 3,27               | ADAM12, AFAP1L2, AIFM1, AKT1, AKT1S1, BAD, BCL2L1, BRD2, CAPN6, CASP1, CAT, CAV1, CCND3, CD274, C           | 96          |
| Cancer, Cell Death and Survival, Organismal Injury and Abnormalities, Tumor Morphology                 | Necrosis of tumor                              | 3,91E-07 | Increased                  | 3,27               | ADAM12, AFAP1L2, AIFM1, AKT1, AKT1S1, BAD, BCL2L1, BRD2, CAPN6, CASP1, CAT, CAV1, CCND3, CD274, C           | 95          |
| Gene Expression, Protein Synthesis                                                                     | Translation of mRNA                            | 5,39E-07 |                            | 0                  | AGO2, AKT1, EIF2AK4, EIF3E, EIF3F, EIF3H, EIF3I, EIF3K, EIF4A2, EIF4EBP2, EIF4F, FMR1, FOXO3, ILF3, IMPACT, | 39          |
| Gene Expression                                                                                        | Expression of mRNA                             | 2,93E-06 |                            | -0,696             | AGO2, AKT1, COPZ1, DDX5, DHX9, EIF2AK4, EIF3E, EIF3F, EIF3H, EIF3I, EIF3K, EIF4A2, EIF4EBP2, EIF4F, FMR1, F | 53          |
| Cell Death and Survival                                                                                | Necrosis                                       | 1,04E-05 |                            | 1,669              | ABCC9, ACAT1, ACE, ACE2, ACVRL1, ADAM12, ADRA1A, ADRM1, AFAP1L2, AGO1, AIFM1, AKT1, AKT1S1, ALK8            | 435         |
| Cell Death and Survival                                                                                | Cell death of sarcoma cell lines               | 2,61E-05 |                            | 0,803              | AIFM1, AKT1, ATAD2, BAD, BCL2L1, BCLAF1, BMX, BUB3, CABLES2, CAPN51, CAV1, CDKN1B, COP1, DHX9, DNA          | 50          |
| Hereditary Disorder, Organismal Injury and Abnormalities, Skeletal and Muscular Disorders              | Hereditary myopathy                            | 3,33E-05 |                            |                    | ABCC9, ACE, ADRA1A, AIFM1, APAS1, APSB1, ASPN, BAG3, BCL2L1, BGN, CASQ1, CCND3, CELF2, CEP85, CF12,         | 110         |
| Cell Death and Survival                                                                                | Cell death of cervical cancer cell lines       | 8,52E-05 | Increased                  | 2,054              | ADRM1, AIFM1, AKT1, ANXA5, ATN1, BAD, BCL2L1, BUB3, CASP1, CAT, CCR2, CCND3, CCT4, CDKN1B, CENPB,           | 75          |
| Developmental Disorder, Hereditary Disorder, Neurological Disease, Organismal Injury and Abnormalities | Cerebro-oculo-facio-skeletal syndrome          | 1,04E-04 |                            |                    | ERCC1, ERCC2, ERCC5, ERCC6                                                                                  | 4           |
| Cell Death and Survival                                                                                | Apoptosis of cervical cancer cell lines        | 1,22E-04 | Increased                  | 2,424              | AIFM1, AKT1, ANXA5, BAD, BCL2L1, CASP1, CAT, CCR2, CCND3, CCT4, CDKN1B, CENPB, DNAJA3, DNMI1, DYI           | 60          |
| Cellular Assembly and Organization                                                                     | Regulation of mitochondria                     | 1,27E-04 |                            |                    | BRCA2, EEF2, ITGB3, MYC, NUP214, PPP2CA, PPP2R1A, RAN, TUBA1B, ZBTB33                                       | 12          |
| Cell Death and Survival                                                                                | Cell death of bone cancer cell lines           | 1,47E-04 |                            | 0,546              | AIFM1, AKT1, ATAD2, BCL2L1, BCLAF1, BUB3, CABLES2, CAPN51, CAV1, CDKN1B, COP1, DHX9, DNAJA3, EEF1A          | 39          |
| Gene Expression                                                                                        | Expression of RNA                              | 1,58E-04 |                            | 0,818              | ACE, ACTG1, ACTR3, ACVRL1, AFAP1L2, AGO1, AGO2, AKAP8L, AKT1, ANGPT1, ARF4, ASXL2, ATAD2, ATF5, AT          | 346         |
| Cancer, Endocrine System Disorders, Organismal Injury and Abnormalities, Reproductive System Diseases  | Stage III-IV serous ovarian adenocarcinoma     | 1,59E-04 |                            |                    | CD274, KLK10, PARP2, PARP3, TUBA1A, TUBA1C, TUBB3, TUBB4A, VEGFA                                            | 9           |
| Cellular Assembly and Organization, DNA Replication, Recombination, and Repair                         | Formation of nuclear envelope                  | 1,93E-04 |                            | -0,342             | PPP2CA, PPP2R1A, RAN, REEP5, RTN1, RTN2, RTN3                                                               | 7           |
| Cell Death and Survival                                                                                | Apoptosis of bone cancer cell lines            | 2,02E-04 |                            | 1,221              | AIFM1, AKT1, ATAD2, BCL2L1, BCLAF1, BUB3, CABLES2, CAPN51, CAV1, CDKN1B, DNAJA3, EEF1A1, ETHE1, FB          | 33          |
| Cell Death and Survival                                                                                | Apoptosis of sarcoma cell lines                | 2,13E-04 |                            | 1,069              | AIFM1, AKT1, ATAD2, BAD, BCL2L1, BCLAF1, BMX, BUB3, CABLES2, CAPN51, CAV1, CDKN1B, DNAJA3, EEF1A1,          | 40          |
| Gene Expression, Protein Synthesis                                                                     | Initiation of translation of mRNA              | 2,48E-04 |                            | -0,063             | AGO2, EIF2AK4, EIF3E, EIF3F, EIF3H, EIF3I, EIF3K, EIF4A2, EIF4EBP2, EIF4F, FMR1, IMPACT, MTIF2, TPR         | 14          |
| Cancer, Cardiovascular Disease, Developmental Disorder, Hematological Disease, Hereditary Disorder, O  | Diamond-Blackfan anemia                        | 2,58E-04 |                            |                    | RPL18, RPL26, RPL35, RPL35A, RPS10, RPS15A, RPS19, RPS20, RPS24, RPS26, RPS28                               | 11          |
| Developmental Disorder, Hereditary Disorder, Organismal Injury and Abnormalities, Skeletal and Musc    | Emery-Dreifuss muscular dystrophy              | 2,74E-04 |                            |                    | ASPN, BGN, CELF2, COL6A1, COL6A2, CYB5G1, EMD, LOXL1, LTBP3, PLOD2, RASSF1, SDC2, SDCBP, SUN2, SYNE         | 16          |
| Cancer, Organismal Injury and Abnormalities                                                            | Peritoneal carcinoma                           | 2,85E-04 |                            |                    | ATIC, CD274, CHD1, IFNGR1, MAP2K2, MAPK1, PARP2, PARP3, TUBA1A, TUBA1C, TUBB3, TUBB4A, VEGFA                | 13          |
| Cancer, Endocrine System Disorders, Organismal Injury and Abnormalities, Reproductive System Diseases  | Advanced ovarian carcinosarcoma                | 2,93E-04 |                            |                    | CD274, PARP2, PARP3, TUBA1A, TUBA1C, TUBB3, TUBB4A, VEGFA                                                   | 8           |
| Cellular Movement                                                                                      | Invasion of breast cell lines                  | 2,95E-04 | Decreased                  | -2,11              | AKT1, ARF4, CDKN1B, CSNK2B, EIF3E, FBLSN, FOXO3, GIT2, HRAS, ITGB3, MAP2K2, MAPK1, OGT, PARVA, RAC1         | 20          |
| Infectious Diseases                                                                                    | Replication of SARS coronavirus                | 3,13E-04 |                            | -0,816             | ACE2, BAG3, IFNAR1, PIKFYVE, SIGMAR1, STAT1                                                                 | 6           |
| Cancer, Organismal Injury and Abnormalities, Reproductive System Disease                               | Recurrent fallopian tube serous adenocarcinoma | 3,46E-04 |                            |                    | MAP2K2, MAPK1, PARP2, PARP3, TUBA1A, TUBA1C, TUBB3, TUBB4A, VEGFA                                           | 9           |
| Cancer, Endocrine System Disorders, Organismal Injury and Abnormalities, Reproductive System Diseases  | Ovarian carcinosarcoma                         | 3,60E-04 |                            |                    | BRCA2, CD274, PARP2, PARP3, TET2, TUBA1A, TUBA1C, TUBB3, TUBB4A, VEGFA                                      | 10          |
| Cell Death and Survival                                                                                | Cell death of connective tissue cells          | 3,97E-04 |                            | 0,532              | ADAM12, AIFM1, AKT1, ATF5, ATN1, BAD, BCL2L1, BGN, BRCA2, C1orf159, CA3, CABLES2, CAPN51, CASP1, CA         | 109         |
| Cancer, Organismal Injury and Abnormalities, Reproductive System Disease                               | Invasive breast adenocarcinoma                 | 4,10E-04 |                            |                    | AKT1, BCIP, BCL2L1, BGN, BRCA2, CCND3, CD274, CHD1, ELP3, HSPB8, LGALS1, LTBP4, MAP2K2, MKI67, MYC          | 30          |
| Cancer, Endocrine System Disorders, Organismal Injury and Abnormalities, Reproductive System Diseases  | Advanced high-grade serous ovarian cancer      | 4,45E-04 |                            |                    | CD274, PARP2, PARP3, TUBA1A, TUBA1C, TUBB3, TUBB4A, VEGFA                                                   | 8           |
| Cancer, Organismal Injury and Abnormalities, Reproductive System Disease                               | Fallopian tube carcinosarcoma                  | 4,45E-04 |                            |                    | CD274, PARP2, PARP3, TUBA1A, TUBA1C, TUBB3, TUBB4A, VEGFA                                                   | 8           |
| Cancer, Organismal Injury and Abnormalities, Reproductive System Disease                               | Primary peritoneal carcinosarcoma              | 4,45E-04 |                            |                    | CD274, PARP2, PARP3, TUBA1A, TUBA1C, TUBB3, TUBB4A, VEGFA                                                   | 8           |
| Gene Expression                                                                                        | Initiation of expression of RNA                | 4,52E-04 |                            | -0,721             | AGO2, EIF2AK4, EIF3E, EIF3F, EIF3H, EIF3I, EIF3K, EIF4A2, EIF4EBP2, EIF4F, FMR1, IMPACT, MAZ, MED4          | 40          |
| Cell Cycle, Renal and Urological System Development and Function                                       | Arrest in G2/M phase of kidney cell lines      | 4,54E-04 |                            |                    | OGT, PPP2CA, PPP2CB, RASSF1, RBBP6                                                                          | 5           |
| Cell Death and Survival                                                                                | Cell death of schwannoma cell lines            | 4,54E-04 |                            | 1,687              | CDKN1B, MYC, RABL6, TNFRSF10A, TNFSF10                                                                      | 5           |
| Cell Cycle, Hair and Skin Development and Function                                                     | Arrest in G2/M phase of epithelial cell lines  | 4,54E-04 |                            |                    | OGT, PPP2CA, PPP2CB, RASSF1, RBBP6                                                                          | 5           |
| Gene Expression                                                                                        | Transcription                                  | 4,56E-04 |                            | 1,034              | ACE, ACTG1, ACTR3, ACVRL1, AFAP1L2, AGO1, AGO2, AKAP8L, AKT1, ANGPT1, ARF4, ASXL2, ATAD2, ATF5, AT          | 323         |
| Nucleic Acid Metabolism, Small Molecule Biochemistry                                                   | Methylation of cytosine                        | 4,80E-04 |                            |                    | IDH1, IDH2, TET2, TRIM28                                                                                    | 4           |
| Cancer, Organismal Injury and Abnormalities, Reproductive System Disease                               | Invasive HER2 negative hormone receptor negati | 4,91E-04 |                            |                    | CD274, CHD1, PARP2, PARP3, TUBA1A, TUBA1C, TUBB3, TUBB4A, VEGFA                                             | 10          |
| Protein Degradation, Protein Synthesis                                                                 | Catabolism of protein                          | 4,97E-04 |                            | -0,688             | ACE, ACE2, ADAM12, ADRM1, AFG3L2, AKT1, AMFR, ANAPC10, ANAPC11, ATP1B2, ATP1B3, AZIN1, BACE2, B             | 113         |
| Small Molecule Biochemistry                                                                            | Metabolism of 2-oxoglutaric acid               | 5,73E-04 |                            |                    | ADHFE1, DLID, IDH1, IDH3B, IDH3G, PHYH                                                                      | 6           |
| Amino Acid Metabolism, Small Molecule Biochemistry                                                     | Catabolism of branched chain amino acids       | 5,65E-04 |                            |                    | ACAD8, ACAT1, DBT, DLD, JVD, MCCCI, MCCSC, PPM1K                                                            | 8           |
| Cancer, Endocrine System Disorders, Organismal Injury and Abnormalities, Reproductive System Diseases  | Stage IIIC-IV serous ovarian cancer            | 5,65E-04 |                            |                    | KLK10, PARP2, PARP3, TUBA1A, TUBA1C, TUBB3, TUBB4A, VEGFA                                                   | 8           |
| Cancer, Organismal Injury and Abnormalities                                                            | Stage III-IV primary peritoneal cancer         | 5,65E-04 |                            |                    | CD274, PARP2, PARP3, TUBA1A, TUBA1C, TUBB3, TUBB4A, VEGFA                                                   | 8           |
| Cancer, Endocrine System Disorders, Organismal Injury and Abnormalities, Reproductive System Diseases  | Stage III serous ovarian adenocarcinoma        | 5,65E-04 |                            |                    | KLK10, PARP2, PARP3, TUBA1A, TUBA1C, TUBB3, TUBB4A, VEGFA                                                   | 8           |
| Cell Death and Survival                                                                                | Apoptosis                                      | 8,73E-04 |                            | 1,602              | ACE, ACE2, ACIN1, ACVRL1, ADAM12, ADRA1A, AFAP1L2, AGO1, AGO2, AIFM1, AIFM2, AKAP8, AKT1, AKT1S1,           | 406         |
| Cancer, Organismal Injury and Abnormalities                                                            | Primary recurrent peritoneal carcinoma         | 8,74E-04 |                            |                    | CD274, MAP2K2, MAPK1, PARP2, PARP3, TUBA1A, TUBA1C, TUBB3, TUBB4A, VEGFA                                    | 10          |
| Cancer, Endocrine System Disorders, Organismal Injury and Abnormalities, Reproductive System Diseases  | Recurrent serous ovarian carcinoma             | 8,74E-04 |                            |                    | CD274, MAP2K2, MAPK1, PARP2, PARP3, TUBA1A, TUBA1C, TUBB3, TUBB4A, VEGFA                                    | 10          |
| Cell Cycle, Gene Expression                                                                            | Binding of PPAR response element               | 9,36E-04 |                            | -0,218             | FOXO1, HRAS, RXRA, THRA, TXN                                                                                | 5           |
| Dermatological Diseases and Conditions, Organismal Injury and Abnormalities                            | UV-sensitive syndrome                          | 9,36E-04 |                            |                    | ERCC1, ERCC2, ERCC5, ERCC6, UVSSA                                                                           | 5           |
| Respiratory System Development and Function                                                            | Elastance of lung                              | 9,36E-04 |                            | -0,555             | ACE2, CAV1, CELA1, MFAP4, SELENON                                                                           | 5           |
| Cancer, Organismal Injury and Abnormalities, Reproductive System Disease                               | Stage III-IV fallopian tube cancer             | 9,40E-04 |                            |                    | CD274, PARP2, PARP3, TUBA1A, TUBA1C, TUBB3, TUBB4A, VEGFA                                                   | 8           |
| Cardiovascular System Development and Function, Cell Morphology, Embryonic Development, Organ D        | Size of cardiomyocytes                         | 9,46E-04 |                            |                    | AKT1, CAPN51, FOXO1, FOXO3, FTO, HRAS, LIMS1, MAP3K1, MYC, NRP1, RAPGEF3, RASSF1, RBP4, RGS2, RHEE          | 17          |
| Cancer, Organismal Injury and Abnormalities, Reproductive System Disease                               | Hormone receptor positive breast adenocarcinor | 1,00E-03 |                            |                    | AKT1, CD274, CHD1, FKBP1A, PARP2, PARP3, TUBA1A, TUBA1C, TUBB3, TUBB4A, VEGFA                               | 11          |
| Cell Cycle                                                                                             | Polyploidy                                     | 1,00E-03 |                            | 0,869              | Anp32b, CCP110, CKS1B, ERCC1, FAN1, FBXO5, H3-3A/H3-3B, IRF1, SAE1, STAT1, TRIM24                           | 11          |



| Categories                                                                                                                           | Diseases or Functions Annotation                                | p-value  | Predicted Activation State | Activation z-score | Molecules                                                                                  | # Molecules |
|--------------------------------------------------------------------------------------------------------------------------------------|-----------------------------------------------------------------|----------|----------------------------|--------------------|--------------------------------------------------------------------------------------------|-------------|
| Nucleic Acid Metabolism,Small Molecule Biochemistry                                                                                  | 5-hydroxymethylation of cytosine                                | 1,03E-03 |                            |                    | IDH1,IDH2,TET2                                                                             | 3           |
| Cell-To-Cell Signaling and Interaction                                                                                               | Adhesion of Streptococcus pneumoniae D39                        | 1,03E-03 |                            |                    | CD151,CD63,CD9                                                                             | 3           |
| Cell Morphology                                                                                                                      | Polarity of eye cell lines                                      | 1,03E-03 |                            |                    | MAPRE1,MAPRE3,RASSF1                                                                       | 3           |
| Cell-To-Cell Signaling and Interaction                                                                                               | Adhesion of Neisseria meningitidis strain MC58 C                | 1,03E-03 |                            |                    | CD151,CD63,CD9                                                                             | 3           |
| Cell Signaling,Nucleic Acid Metabolism,Small Molecule Biochemistry                                                                   | Incorporation of guanosine 5'-O-(3-thiotriphosph                | 1,03E-03 |                            |                    | CXCL10,GNAI2,GNAI3                                                                         | 3           |
| Connective Tissue Development and Function                                                                                           | Development of fat pad                                          | 1,03E-03 |                            |                    | CAV1,SEMA7A,VEGFA                                                                          | 3           |
| Cell-To-Cell Signaling and Interaction                                                                                               | Adhesion of Neisseria lactamica NL1009                          | 1,03E-03 |                            |                    | CD151,CD63,CD9                                                                             | 3           |
| Cardiovascular System Development and Function,Cellular Development,Cellular Growth and Proliferation                                | Colony formation of endothelial cell lines                      | 1,03E-03 |                            |                    | MYC,RHOC,SF3B1                                                                             | 3           |
| Cancer,Organismal Injury and Abnormalities                                                                                           | Primary peritoneal serous adenocarcinoma                        | 1,14E-03 |                            |                    | CD274,MAP2K2,MAPK1,PARP2,PARP3,TUBA1A,TUBA1C,TUBB3,TUBB4A,VEGFA                            | 10          |
| Cardiovascular Disease,Developmental Disorder,Hematological Disease,Organismal Injury and Abnormalities                              | Congenital aplastic anemia                                      | 1,19E-03 |                            |                    | BRCA2,CAT,FKBP1A,GPX1,RPL18,RPL26,RPL35,RPL35A,RPS10,RPS15A,RPS19,RPS20,RPS24,RPS26,RPS2   | 16          |
| Cancer,Organismal Injury and Abnormalities                                                                                           | Stage III primary peritoneal cancer                             | 1,25E-03 |                            |                    | PARP2,PARP3,TUBA1A,TUBA1C,TUBB3,TUBB4A,VEGFA                                               | 7           |
| Cancer,Organismal Injury and Abnormalities                                                                                           | Advanced primary BRCA2 mutation positive perit                  | 1,25E-03 |                            |                    | CD274,PARP2,PARP3,TUBA1A,TUBA1C,TUBB3,TUBB4A                                               | 7           |
| Cancer,Organismal Injury and Abnormalities                                                                                           | Advanced primary BRCA1 mutation positive perit                  | 1,25E-03 |                            |                    | CD274,PARP2,PARP3,TUBA1A,TUBA1C,TUBB3,TUBB4A                                               | 7           |
| Cancer,Endocrine System Disorders,Organismal Injury and Abnormalities,Reproductive System Diseases                                   | Stage IV serous ovarian adenocarcinoma                          | 1,25E-03 |                            |                    | PARP2,PARP3,TUBA1A,TUBA1C,TUBB3,TUBB4A,VEGFA                                               | 7           |
| Cancer,Organismal Injury and Abnormalities                                                                                           | Stage IV primary peritoneal cancer                              | 1,25E-03 |                            |                    | PARP2,PARP3,TUBA1A,TUBA1C,TUBB3,TUBB4A,VEGFA                                               | 7           |
| Cancer,Endocrine System Disorders,Organismal Injury and Abnormalities,Reproductive System Diseases                                   | Advanced BRCA2 mutation positive ovarian tumor                  | 1,25E-03 |                            |                    | CD274,PARP2,PARP3,TUBA1A,TUBA1C,TUBB3,TUBB4A                                               | 7           |
| Cancer,Endocrine System Disorders,Organismal Injury and Abnormalities,Reproductive System Diseases                                   | BRCA2 mutation positive ovarian carcinosarcoma                  | 1,25E-03 |                            |                    | CD274,PARP2,PARP3,TUBA1A,TUBA1C,TUBB3,TUBB4A                                               | 7           |
| Cancer,Organismal Injury and Abnormalities,Reproductive System Disease                                                               | BRCA2 mutation positive fallopian tube carcinoma                | 1,25E-03 |                            |                    | CD274,PARP2,PARP3,TUBA1A,TUBA1C,TUBB3,TUBB4A                                               | 7           |
| Cancer,Organismal Injury and Abnormalities,Reproductive System Disease                                                               | Stage III fallopian tube cancer                                 | 1,25E-03 |                            |                    | PARP2,PARP3,TUBA1A,TUBA1C,TUBB3,TUBB4A,VEGFA                                               | 7           |
| Cancer,Endocrine System Disorders,Organismal Injury and Abnormalities,Reproductive System Diseases                                   | BRCA1 mutation positive ovarian carcinosarcoma                  | 1,25E-03 |                            |                    | CD274,PARP2,PARP3,TUBA1A,TUBA1C,TUBB3,TUBB4A                                               | 7           |
| Cancer,Organismal Injury and Abnormalities,Reproductive System Disease                                                               | Primary BRCA2 mutation positive peritoneal carcinoma            | 1,25E-03 |                            |                    | CD274,PARP2,PARP3,TUBA1A,TUBA1C,TUBB3,TUBB4A                                               | 7           |
| Cancer,Organismal Injury and Abnormalities,Reproductive System Disease                                                               | BRCA1 mutation positive fallopian tube carcinoma                | 1,25E-03 |                            |                    | CD274,PARP2,PARP3,TUBA1A,TUBA1C,TUBB3,TUBB4A                                               | 7           |
| Cancer,Endocrine System Disorders,Organismal Injury and Abnormalities,Reproductive System Diseases                                   | Advanced BRCA1 mutation positive ovarian tumor                  | 1,25E-03 |                            |                    | CD274,PARP2,PARP3,TUBA1A,TUBA1C,TUBB3,TUBB4A                                               | 7           |
| Cancer,Organismal Injury and Abnormalities,Reproductive System Disease                                                               | Primary BRCA1 mutation positive peritoneal carcinoma            | 1,25E-03 |                            |                    | CD274,PARP2,PARP3,TUBA1A,TUBA1C,TUBB3,TUBB4A                                               | 7           |
| Cellular Development,Reproductive System Development and Function                                                                    | Epithelial-mesenchymal transition of breast cell lines          | 1,26E-03 |                            | -0,025             | AKT1,CDKN1B,CSNK2B,CUL4A,EIF3E,FBLN5,HRAS,IDH1,ITGB3,MAP2K2,MAPK1,PCBP1,RAC1,SEMA7A,T      | 15          |
| Cell Death and Survival                                                                                                              | Apoptosis of T-cell hybrid cells                                | 1,26E-03 |                            | -0,863             | AKT1,BCL2L1,DNAJA3,HRAS,MYC,RELA,RORC,SIVA1,TNFAIP3                                        | 9           |
| Cancer,Endocrine System Disorders,Organismal Injury and Abnormalities,Reproductive System Diseases                                   | Platinum-sensitive recurrent ovarian cancer                     | 1,26E-03 |                            |                    | BRCA2,CD274,PARP2,PARP3,TUBA1A,TUBA1C,TUBB3,TUBB4A,VEGFA                                   | 9           |
| Developmental Disorder,Hereditary Disorder,Organismal Injury and Abnormalities,Skeletal and Muscular System Development and Function | Autosomal dominant Emery-Dreifuss muscular dystrophy            | 1,31E-03 |                            |                    | ASPN,BGN,CELF2,COL6A1,COL6A2,CYB561,LOXL1,LTBP3,PLD2,RASSF1,SDC2,SDCBP,SYNE2,TMEM43        | 14          |
| Neurological Disease,Organismal Injury and Abnormalities,Psychological Disorders                                                     | Hypomyelinating leukodystrophy                                  | 1,31E-03 |                            |                    | AIFM1,DEGS1,HKESHI,POLR1C,POLR3B,TMEM106B,TMEM63A,TUBB4A                                   | 8           |
| Cardiovascular Disease,Dermatological Diseases and Conditions,Hereditary Disorder,Organismal Injury and Abnormalities                | Hereditary hemorrhagic telangiectasia                           | 1,32E-03 |                            |                    | ACVRL1,BMPR2,SMAD4,VEGFA                                                                   | 4           |
| Cancer,Organismal Injury and Abnormalities                                                                                           | Invasive adenocarcinoma                                         | 1,33E-03 |                            |                    | AKT1,BCIP1,BCL2L1,BGN,BRCA2,CCND3,CD274,CHD1,ELP3,HSPB8,LGALS1,LTBP3,MAP2K2,MKI67,MYC      | 32          |
| Cellular Development                                                                                                                 | Epithelial-mesenchymal transition                               | 1,35E-03 |                            | -0,352             | AKT1,ARHGAP21,BTBD7,CAV1,CDKN1B,CLIC4,CSNK2B,CUL4A,DDX5,EIF3E,FBLN5,FLNA,FOXO2,FOXO3,I     | 44          |
| Skeletal and Muscular Disorders                                                                                                      | Muscle laminopathy                                              | 1,38E-03 |                            |                    | ASPN,BGN,CELF2,COL6A1,COL6A2,CYB561,EMD,LOXL1,LTBP3,PLD2,RASSF1,SDC2,SDCB                  | 18          |
| Cell Cycle                                                                                                                           | G2/M phase                                                      | 1,40E-03 |                            | -1,195             | ARPP19,ATF5,BCL2L1,Calm1 (includes others),CAT,CCP110,CDKN1B,CELF2,CENP1,CEP135,CEP152,CEP | 54          |
| Cancer,Endocrine System Disorders,Organismal Injury and Abnormalities                                                                | Benign neoplasm of adrenal gland                                | 1,45E-03 |                            |                    | ALDH5A1,ASPN,BGN,COL6A1,COL6A2,DAD1,DDOST,EFEMP2,FLNC,GOLGA1,HRAS,MGAT1,OSTC,PREF          | 19          |
| Cancer,Organismal Injury and Abnormalities,Reproductive System Disease                                                               | Unresectable breast cancer                                      | 1,47E-03 |                            |                    | AKT1,CD274,FKBP1A,PARP2,PARP3,TUBA1A,TUBA1C,TUBB3,TUBB4A,VEGFA                             | 10          |
| Cancer,Organismal Injury and Abnormalities                                                                                           | Metastasis of colorectal cancer cell lines                      | 1,47E-03 |                            | -1,414             | AKT1,CAV1,FOXO2,IRF1,KDM3A,MTDH,RBP1,RICTOR,SH3BGR1,STIM1                                  | 10          |
| Skeletal and Muscular Disorders                                                                                                      | Laminopathy                                                     | 1,49E-03 |                            |                    | ABCC9,ASPN,BAG3,BGN,CELF2,COL6A1,COL6A2,CYB561,EMD,LOXL1,LTBP3,PLD2,RASSF1,SDC2,SDCB       | 20          |
| Cancer,Organismal Injury and Abnormalities,Reproductive System Disease                                                               | Recurrent HER2 negative invasive breast cancer                  | 1,59E-03 |                            |                    | CD274,CHD1,FKBP1A,PARP2,PARP3,TUBA1A,TUBA1C,TUBB3,TUBB4A,VEGFA                             | 11          |
| Cancer,Endocrine System Disorders,Organismal Injury and Abnormalities,Reproductive System Diseases                                   | Stage IV HER2 negative invasive breast cancer                   | 1,59E-03 |                            |                    | CD274,CHD1,FKBP1A,PARP2,PARP3,TUBA1A,TUBA1C,TUBB3,TUBB4A,VEGFA                             | 11          |
| Cellular Development,Cellular Growth and Proliferation,Connective Tissue Development and Function                                    | Differentiation of erythroid precursor cells                    | 1,70E-03 |                            | -1,146             | AXL,BCL2L1,BCR,BRD1,Cdc42,FLI1,HRAS,HSPA9,IRF1,MAPK1,MYC,RPS14,RPS19,RXRA,STAT5A,TET2,TIR  | 20          |
| Cancer,Hematological Disease,Immunological Disease,Organismal Injury and Abnormalities                                               | B-cell polyclonal leukemia                                      | 1,72E-03 |                            |                    | BCLAF1,CHD2,MYC,SETD2,SF3B1                                                                | 5           |
| Developmental Disorder,Neurological Disease,Organismal Injury and Abnormalities                                                      | Dandy-Walker syndrome                                           | 1,72E-03 |                            |                    | DPYSL5,PIBF1,PPP1CB,SETD2,TUBA1A                                                           | 5           |
| Cancer,Organismal Injury and Abnormalities,Reproductive System Disease                                                               | Nonmetastatic primary hormone receptor negative breast cancer   | 1,80E-03 |                            |                    | CD274,CHD1,PARP2,PARP3,TUBA1A,TUBA1C,TUBB3,TUBB4A                                          | 8           |
| Cancer,Organismal Injury and Abnormalities                                                                                           | Relapsed primary peritoneal cancer                              | 1,80E-03 |                            |                    | CD274,PARP2,PARP3,TUBA1A,TUBA1C,TUBB3,TUBB4A,VEGFA                                         | 8           |
| Cancer,Endocrine System Disorders,Organismal Injury and Abnormalities,Reproductive System Diseases                                   | Non-mucinous ovarian carcinoma                                  | 1,80E-03 |                            |                    | CD274,PARP2,PARP3,TUBA1A,TUBA1C,TUBB3,TUBB4A,VEGFA                                         | 8           |
| Cancer,Endocrine System Disorders,Organismal Injury and Abnormalities,Reproductive System Diseases                                   | BRCA2 mutation negative epithelial ovarian cancer               | 1,80E-03 |                            |                    | CD274,PARP2,PARP3,TUBA1A,TUBA1C,TUBB3,TUBB4A,VEGFA                                         | 8           |
| Cancer,Organismal Injury and Abnormalities,Reproductive System Disease                                                               | Relapsed fallopian tube cancer                                  | 1,80E-03 |                            |                    | CD274,PARP2,PARP3,TUBA1A,TUBA1C,TUBB3,TUBB4A,VEGFA                                         | 8           |
| Cancer,Organismal Injury and Abnormalities,Tumor Morphology                                                                          | Progressive primary peritoneal cancer                           | 1,80E-03 |                            |                    | CD274,PARP2,PARP3,TUBA1A,TUBA1C,TUBB3,TUBB4A,VEGFA                                         | 8           |
| Cancer,Endocrine System Disorders,Organismal Injury and Abnormalities,Reproductive System Diseases                                   | BRCA1 mutation negative epithelial ovarian cancer               | 1,80E-03 |                            |                    | CD274,PARP2,PARP3,TUBA1A,TUBA1C,TUBB3,TUBB4A,VEGFA                                         | 8           |
| Cancer                                                                                                                               | Transformation of skin cell lines                               | 1,80E-03 |                            | -1,528             | HRAS,MAP3K8,MAPK1,MYC,RELA,SDCBP,SEM1                                                      | 7           |
| Cancer,Organismal Injury and Abnormalities                                                                                           | BRCA1 mutation negative BRCA2 mutation negative breast cancer   | 1,80E-03 |                            |                    | PARP2,PARP3,TUBA1A,TUBA1C,TUBB3,TUBB4A,VEGFA                                               | 7           |
| Cancer,Organismal Injury and Abnormalities,Reproductive System Disease                                                               | BRCA1 mutation negative BRCA2 mutation negative breast cancer   | 1,80E-03 |                            |                    | PARP2,PARP3,TUBA1A,TUBA1C,TUBB3,TUBB4A,VEGFA                                               | 7           |
| Cell-To-Cell Signaling and Interaction,Cellular Assembly and Organization                                                            | Quantity of focal adhesions                                     | 1,87E-03 |                            | 0,293              | ARHGAP35,CAPNS1,CAT,CAV1,CDH5,CFL2,FLNA,MYC,PTPN12,RAC1,RACK1,STRIP1,TIMP1,VEGFA           | 14          |
| Cancer,Organismal Injury and Abnormalities,Reproductive System Disease                                                               | HER2 negative hormone receptor positive breast cancer           | 1,88E-03 |                            |                    | AKT1,CHD1,FKBP1A,PARP2,PARP3,TUBA1A,TUBA1C,TUBB3,TUBB4A,VEGFA                              | 10          |
| Connective Tissue Development and Function,Skeletal and Muscular System Development and Function                                     | Attachment of sternum                                           | 1,88E-03 |                            |                    | BMPR2,Cdkn1c,CHUK,DEAF1,GNAI2,GNAI3,LMO4,SF3B1,SLC29A1,WFIKK2                              | 10          |
| Cell Death and Survival                                                                                                              | Cell death of fibrosarcoma cell lines                           | 1,91E-03 |                            | 1,475              | BCL2L1,BMX,FTH1,LIMS1,NFKBIZ,OA21,RABL6,STAT1,STAT2,TBK1,TNFRSF10A,TNFSF10,TNFSF12,TRAF    | 16          |
| Cell Death and Survival                                                                                                              | Cell death of hybrid cells                                      | 1,98E-03 |                            | -0,736             | AKT1,BCL2L1,DNAJA3,HRAS,LAMP2,MYC,OPTN,RELA,RORC,SIVA1,TNFAIP3                             | 11          |
| Cancer,Organismal Injury and Abnormalities,Reproductive System Disease                                                               | HER2 negative breast adenocarcinoma                             | 1,98E-03 |                            |                    | AKT1,CD274,CHD1,FKBP1A,PARP2,PARP3,TUBA1A,TUBA1C,TUBB3,TUBB4A,VEGFA                        | 11          |
| Gene Expression                                                                                                                      | Transcription of RNA                                            | 2,04E-03 |                            | 0,86               | ACTR3,ACVRL1,AFAP1L2,AGO1,AGO2,AKAP8L,AKT1,ARF4,ASXL2,ATAD2,ATF5,ATN1,ATP2B4,BAD,BCL2      | 278         |
| Developmental Disorder,Hereditary Disorder,Organismal Injury and Abnormalities,Skeletal and Muscular System Development and Function | Dystrophy of muscle                                             | 2,07E-03 |                            |                    | ACE,ADRA1A,ASPN,BGN,CCND3,CELF2,CNBP,COL6A1,COL6A2,CYB561,DAG1,DDX5,DPAGT1,DPM3,EM         | 43          |
| Cancer,Organismal Injury and Abnormalities,Reproductive System Disease                                                               | Triple negative breast adenocarcinoma                           | 2,17E-03 |                            |                    | AKT1,CD274,CHD1,PARP2,PARP3,TUBA1A,TUBA1C,TUBB3,TUBB4A                                     | 9           |
| Cancer,Endocrine System Disorders,Organismal Injury and Abnormalities,Reproductive System Diseases                                   | Advanced HER2 negative hormone receptor negative breast cancer  | 2,17E-03 |                            |                    | AKT1,CD274,CHD1,TUBA1A,TUBA1C,TUBB3,TUBB4A,VEGFA                                           | 9           |
| Cancer,Endocrine System Disorders,Organismal Injury and Abnormalities                                                                | Adrenal gland tumor                                             | 2,28E-03 |                            |                    | ACVRL1,ADRA1A,ALDH5A1,ASPN,BGN,BMPR2,CDKN1B,COL6A1,COL6A2,DAD1,DDOST,EFEMP2,FLNC,C         | 32          |
| Cancer,Endocrine System Disorders,Organismal Injury and Abnormalities,Reproductive System Diseases                                   | Stage IV estrogen receptor positive HER2 negative breast cancer | 2,37E-03 |                            |                    | CHD1,FKBP1A,PARP2,PARP3,TUBA1A,TUBA1C,TUBB3,TUBB4A,VEGFA                                   | 10          |
| Cancer,Endocrine System Disorders,Organismal Injury and Abnormalities,Reproductive System Diseases                                   | Stage IV estrogen receptor positive HER2 negative breast cancer | 2,37E-03 |                            |                    | CHD1,FKBP1A,PARP2,PARP3,TUBA1A,TUBA1C,TUBB3,TUBB4A,VEGFA                                   | 10          |



| Categories                                                                                         | Diseases or Functions Annotation                 | p-value  | Predicted Activation State | Activation z-score | Molecules                                                                                  | # Molecules |
|----------------------------------------------------------------------------------------------------|--------------------------------------------------|----------|----------------------------|--------------------|--------------------------------------------------------------------------------------------|-------------|
| Cancer,Organismal Injury and Abnormalities,Respiratory Disease                                     | ALK fusion negative EGFR mutation negative non-  | 2,37E-03 |                            |                    | ATIC,AXL,CD274,PARP2,PARP3,TUBA1A,TUBA1C,TUBB3,TUBB4A,VEGFA                                | 10          |
| Cancer,Organismal Injury and Abnormalities,Reproductive System Disease                             | Recurrent estrogen receptor positive HER2 negat  | 2,37E-03 |                            |                    | CHD1,FKBP1A,PARP2,PARP3,TUBA1A,TUBA1C,TUBB3,TUBB4A,VEGFA                                   | 10          |
| Cancer,Endocrine System Disorders,Organismal Injury and Abnormalities,Reproductive System Diseases | Stage IV HER2 negative progesterone receptor pc  | 2,37E-03 |                            |                    | CHD1,FKBP1A,PARP2,PARP3,TUBA1A,TUBA1C,TUBB3,TUBB4A,VEGFA                                   | 10          |
| Cancer,Organismal Injury and Abnormalities                                                         | Metastasis of adenocarcinoma                     | 2,38E-03 |                            | -0,57              | AKT1,CBR1,LGALS1,MYC,THRA,THRB                                                             | 6           |
| Cancer,Organismal Injury and Abnormalities                                                         | Primary peritoneal mixed carcinoma               | 2,41E-03 |                            |                    | CD274,PARP2,PARP3,TUBA1A,TUBA1C,TUBB3,TUBB4A,VEGFA                                         | 8           |
| Cancer,Organismal Injury and Abnormalities,Reproductive System Disease                             | Recurrent uterine sarcoma                        | 2,41E-03 |                            |                    | CD274,PARP2,PARP3,TUBA1A,TUBA1C,TUBB3,TUBB4A,VEGFA                                         | 8           |
| Cancer,Organismal Injury and Abnormalities                                                         | Primary BRCA2 mutation positive peritoneal canc  | 2,41E-03 |                            |                    | CD274,PARP2,PARP3,TUBA1A,TUBA1C,TUBB3,TUBB4A,VEGFA                                         | 8           |
| Cancer,Organismal Injury and Abnormalities                                                         | Primary recurrent peritoneal cancer              | 2,41E-03 |                            |                    | CD274,PARP2,PARP3,TUBA1A,TUBA1C,TUBB3,TUBB4A,VEGFA                                         | 8           |
| Cancer,Organismal Injury and Abnormalities                                                         | BRCA1 mutation positive primary peritoneal canc  | 2,41E-03 |                            |                    | CD274,PARP2,PARP3,TUBA1A,TUBA1C,TUBB3,TUBB4A,VEGFA                                         | 8           |
| Cancer,Organismal Injury and Abnormalities                                                         | BRCA2 mutation negative peritoneal cancer        | 2,41E-03 |                            |                    | CD274,PARP2,PARP3,TUBA1A,TUBA1C,TUBB3,TUBB4A,VEGFA                                         | 8           |
| Cancer,Organismal Injury and Abnormalities                                                         | BRCA1 mutation negative peritoneal cancer        | 2,41E-03 |                            |                    | CD274,PARP2,PARP3,TUBA1A,TUBA1C,TUBB3,TUBB4A,VEGFA                                         | 8           |
| Cancer,Immunological Disease,Organismal Injury and Abnormalities                                   | Thymoma                                          | 2,44E-03 |                            |                    | AKT1,CASP1,ERCC1,FKBP1A,HRA5,MKI67,MYC,TUBA1A,TUBA1C,TUBB3,TUBB4A                          | 11          |
| Organismal Development                                                                             | Growth of multicellular organism                 | 2,47E-03 |                            |                    | ATF5,ATN1,BRCA2,Cdkn1c,CELA1,CLIC4,ERCC1,ERCC2,ERCC5,ERCC6,H3-3A/H3-3B,HLA-A,KDM2A,NEK1    | 21          |
| Infectious Diseases                                                                                | Viral Infection                                  | 2,49E-03 | Decreased                  | -5,416             | ABCD2,ACE,ACE2,ACTR3,ADRA1A,AFG3L2,AGO1,AGO2,AHSG,AKT1,ALKBH3,ANKRD6,ANXA5,AP2A1,AF        | 274         |
| Skeletal and Muscular System Development and Function                                              | Morphology of muscle                             | 2,50E-03 |                            |                    | ACADM,ACE,ACVRL1,ADAM12,ADRA1A,AKT1,BAG3,BCL2L1,BGN,BMX,CAPN6,CAPNS1,CAT,CAV1,CD55         | 95          |
| Cancer,Hereditary Disorder,Organismal Injury and Abnormalities                                     | Hereditary cancer-predisposing syndrome          | 2,52E-03 |                            |                    | AKT1,AXIN2,AXL,BCL2L1,BRCA2,CAT,CD274,CDKN1B,CHIC2,CYB561,DDX41,EHBP1,EIF2AK4,EHFB2,ERC    | 70          |
| Cancer,Organismal Injury and Abnormalities,Reproductive System Disease                             | Stage IV fallopian tube cancer                   | 2,53E-03 |                            |                    | PARP2,PARP3,TUBA1A,TUBA1C,TUBB3,TUBB4A,VEGFA                                               | 7           |
| Cancer,Organismal Injury and Abnormalities,Respiratory Disease,Tumor Morphology                    | Stage IV progressive EGFR activating mutation po | 2,53E-03 |                            |                    | ATIC,CD274,TUBA1A,TUBA1C,TUBB3,TUBB4A,VEGFA                                                | 7           |
| Cancer,Organismal Injury and Abnormalities,Reproductive System Disease                             | Unresectable HER2 negative breast adenocarcino   | 2,53E-03 |                            |                    | AKT1,CD274,TUBA1A,TUBA1C,TUBB3,TUBB4A,VEGFA                                                | 7           |
| Cancer,Organismal Injury and Abnormalities,Respiratory Disease                                     | Stage IV ALK translocation positive nonsquamous  | 2,53E-03 |                            |                    | ATIC,CD274,TUBA1A,TUBA1C,TUBB3,TUBB4A,VEGFA                                                | 7           |
| Cancer,Organismal Injury and Abnormalities                                                         | Stage III-IV primary peritoneal carcinoma        | 2,53E-03 |                            |                    | CD274,PARP2,TUBA1A,TUBA1C,TUBB3,TUBB4A,VEGFA                                               | 7           |
| Cell Cycle                                                                                         | G2 phase                                         | 2,66E-03 |                            | -0,99              | AKT1,ARPP19,ATF5,BCL2L1,Calm1 (includes others),CAT,CCP110,CDKN1B,CELF2,CENPJ,CEP135,CEP15 | 61          |
| Embryonic Development,Organismal Development,Tissue Morphology                                     | Morphology of germ layer                         | 2,78E-03 |                            |                    | BMPR2,CR1L,DAD1,DAG1,DHX9,DRAP1,IL11RA,MAPK1,PBX1,PIKFYVE,PPP2CA,PTGIS,RAB10,RAC1,SMA      | 21          |
| Cancer,Organismal Injury and Abnormalities,Reproductive System Disease                             | Advanced hormone receptor positive breast canc   | 2,78E-03 |                            |                    | AKT1,CD274,CHD1,FKBP1A,HDAC10,PARP2,PARP3,TUBA1A,TUBA1C,TUBB3,TUBB4A,VEGFA                 | 13          |
| Cardiovascular Disease,Hematological Disease,Organismal Injury and Abnormalities                   | Aplastic anemia                                  | 2,79E-03 |                            |                    | BRCA2,CAT,DDX41,FKBP1A,GPX1,PPP3R1,RPL18,RPL26,RPL35,RPL35A,RPS10,RPS15A,RPS19,RPS20,RP    | 19          |
| Cancer,Organismal Injury and Abnormalities,Respiratory Disease                                     | Early stage non-small cell lung cancer           | 2,82E-03 |                            |                    | ACTR1B,AGO1,AGO2,ATIC,CD274,EEF1A1,RHOC,RPL7,RPS11,RPS27A,SSR2,TUBA1A,TUBA1C,TUBB3,TU      | 15          |
| Cancer,Organismal Injury and Abnormalities                                                         | Peritoneal cavity cancer                         | 2,82E-03 |                            |                    | ANGPT1,ATIC,BRCA2,CD274,CHD1,IFNGR1,MAP2K2,MAPK1,PARP2,PARP3,TUBA1A,TUBA1C,TUBB3,TU        | 15          |
| Cell Morphology,Hematological System Development and Function                                      | Morphology of B-lymphocyte derived cell lines    | 2,84E-03 |                            |                    | AKT1,BCL2L1,CRKL,MYC                                                                       | 4           |
| Cellular Assembly and Organization                                                                 | Dispersal of Golgi apparatus                     | 2,84E-03 |                            | -1,982             | BRD8,GOLPH3,RASSF1,RI NT1                                                                  | 4           |
| Cancer,Dermatological Diseases and Conditions,Organismal Injury and Abnormalities                  | Hyperplasia of keratinocytes                     | 2,84E-03 |                            | 0,152              | RAC1,RRXA,THRA,THRB                                                                        | 4           |
| Cardiovascular System Development and Function,Hematological System Development and Function       | Diastolic pressure of left ventricle             | 2,84E-03 |                            | 1,067              | ACE2,HSPB8,ITGB3,TIMP1                                                                     | 4           |
| Amino Acid Metabolism,Small Molecule Biochemistry                                                  | Synthesis of glutamine                           | 2,84E-03 |                            | 1,154              | IDH1,IKBKE,MYC,PRKAR1A                                                                     | 4           |
| DNA Replication, Recombination, and Repair                                                         | Metabolism of DNA                                | 2,84E-03 |                            | 0,735              | AAGAB,ACIN1,ACVRL1,AIFM1,AKAP8L,AKT1,ANGPT1,ANTXR1,APOBEC3B,BANF1,BCL2L1,BMX,BRCA2,C       | 69          |
| Cardiovascular Disease,Hereditary Disorder,Organismal Injury and Abnormalities,Respiratory Disease | Familial primary pulmonary hypertension          | 2,89E-03 |                            |                    | ACVRL1,BMPR2,CAV1,EIF2AK4,SMAD4                                                            | 5           |
| Developmental Disorder,Hereditary Disorder,Metabolic Disease,Organismal Injury and Abnormalities   | Acyl-coa dehydrogenase deficiency                | 2,89E-03 |                            |                    | ACAD8,ACAD9,ACADL,ACADM,ETFDH                                                              | 5           |
| Cancer,Organismal Injury and Abnormalities,Reproductive System Disease                             | Fallopian tube serous adenocarcinoma             | 2,95E-03 |                            |                    | CD274,MAP2K2,MAPK1,PARP2,PARP3,TUBA1A,TUBA1C,TUBB3,TUBB4A,VEGFA                            | 10          |
| Cancer,Hematological Disease,Hereditary Disorder,Organismal Injury and Abnormalities               | Constitutional bone marrow failure syndrome      | 2,98E-03 |                            |                    | BRCA2,CAT,FKBP1A,GPX1,RPL18,RPL26,RPL35,RPL35A,RPS10,RPS15A,RPS19,RPS20,RPS26,RPS2         | 16          |
| Cancer,Organismal Injury and Abnormalities                                                         | Progesterone receptor positive cancer            | 2,98E-03 |                            |                    | AKT1,CHD1,FKBP1A,GON4L,HSPB8,LTBP3,PARP2,PARP3,PLK2,SF3B1,TUBA1A,TUBA1C,TUBB3,TU           | 16          |
| Infectious Diseases,Organismal Injury and Abnormalities                                            | Infection of embryonic cell lines                | 3,10E-03 | Decreased                  | -2,555             | ACE2,AFG3L2,ALKBH3,AXL,CD164,CLIP3,DAG1,DAZAP2,DBN1,DDX23,DPSYLS5,ERCC1,ERCC5,ERI3,FAM1    | 48          |
| Hematological Disease                                                                              | Failure of bone marrow                           | 3,14E-03 |                            |                    | BRCA2,CAT,FKBP1A,GPX1,IFNAR1,MDM4,RPL18,RPL26,RPL35,RPL35A,RPS10,RPS15A,RPS19,RPS20,RP     | 18          |
| Cell Morphology,Connective Tissue Development and Function                                         | Morphology of fibroblast cell lines              | 3,15E-03 |                            |                    | ACVRL1,ADAM12,AFAP1L1,AKT1,BCL2L1,CAV1,Cdc42,CDC42EP5,CDKN1B,DPY30,ECM1,HRA5,KRT18,I       | 20          |
| Cell Signaling                                                                                     | I-kappaB kinase/NF-kappaB cascade                | 3,16E-03 |                            | -1,266             | AKT1,ANGPT1,CASP1,CHUK,ECM1,EEF1D,FKBP1A,FLNA,IRF1,LGALS1,MALTI1,MAP3K14,MTDH,NDFIP1,      | 35          |
| Cancer,Inflammatory Disease,Inflammatory Response,Organismal Injury and Abnormalities,Reproduc     | Nonmetastatic inflammatory breast cancer         | 3,18E-03 |                            |                    | CD274,CHD1,PARP2,PARP3,TUBA1A,TUBA1C,TUBB3,TUBB4A                                          | 8           |
| Cancer,Organismal Injury and Abnormalities                                                         | High grade primary peritoneal serous adenocarci  | 3,18E-03 |                            |                    | CD274,PARP2,PARP3,TUBA1A,TUBA1C,TUBB3,TUBB4A,VEGFA                                         | 8           |
| Cancer,Organismal Injury and Abnormalities,Reproductive System Disease                             | High grade fallopian tube endometrioid adenocai  | 3,18E-03 |                            |                    | CD274,PARP2,PARP3,TUBA1A,TUBA1C,TUBB3,TUBB4A,VEGFA                                         | 8           |
| Cancer,Endocrine System Disorders,Organismal Injury and Abnormalities,Reproductive System Diseases | BRCA2 mutation positive ovarian carcinoma        | 3,18E-03 |                            |                    | CD274,PARP2,PARP3,TUBA1A,TUBA1C,TUBB3,TUBB4A,VEGFA                                         | 8           |
| Cancer,Endocrine System Disorders,Organismal Injury and Abnormalities,Reproductive System Diseases | BRCA1 mutation positive ovarian carcinoma        | 3,18E-03 |                            |                    | CD274,PARP2,PARP3,TUBA1A,TUBA1C,TUBB3,TUBB4A,VEGFA                                         | 8           |
| Cancer,Organismal Injury and Abnormalities,Reproductive System Disease                             | BRCA1 mutation negative fallopian tube cancer    | 3,18E-03 |                            |                    | CD274,PARP2,PARP3,TUBA1A,TUBA1C,TUBB3,TUBB4A,VEGFA                                         | 8           |
| Cancer,Organismal Injury and Abnormalities,Reproductive System Disease                             | BRCA1 mutation positive fallopian tube cancer    | 3,18E-03 |                            |                    | CD274,PARP2,PARP3,TUBA1A,TUBA1C,TUBB3,TUBB4A,VEGFA                                         | 8           |
| Cancer,Organismal Injury and Abnormalities,Reproductive System Disease                             | BRCA2 mutation negative fallopian tube cancer    | 3,18E-03 |                            |                    | CD274,PARP2,PARP3,TUBA1A,TUBA1C,TUBB3,TUBB4A,VEGFA                                         | 8           |
| Cancer,Organismal Injury and Abnormalities                                                         | High grade primary peritoneal endometrioid carc  | 3,18E-03 |                            |                    | CD274,PARP2,PARP3,TUBA1A,TUBA1C,TUBB3,TUBB4A,VEGFA                                         | 8           |
| Cancer,Organismal Injury and Abnormalities,Reproductive System Disease                             | BRCA2 mutation positive fallopian tube cancer    | 3,18E-03 |                            |                    | CD274,PARP2,PARP3,TUBA1A,TUBA1C,TUBB3,TUBB4A,VEGFA                                         | 8           |
| Cancer,Endocrine System Disorders,Organismal Injury and Abnormalities,Reproductive System Diseases | High grade ovarian endometrioid carcinoma        | 3,18E-03 |                            |                    | CD274,PARP2,PARP3,TUBA1A,TUBA1C,TUBB3,TUBB4A,VEGFA                                         | 8           |
| Cancer,Organismal Injury and Abnormalities,Reproductive System Disease                             | Primary triple negative breast cancer            | 3,18E-03 |                            |                    | CD274,CHD1,PARP2,PARP3,TUBA1A,TUBA1C,TUBB3,TUBB4A                                          | 8           |
| Cancer,Organismal Injury and Abnormalities,Reproductive System Disease                             | Advanced fallopian tube cancer                   | 3,18E-03 |                            |                    | CD274,PARP2,PARP3,TUBA1A,TUBA1C,TUBB3,TUBB4A,VEGFA                                         | 8           |
| Cell Cycle                                                                                         | Mitosis                                          | 3,20E-03 |                            | -1,508             | AFAP1L2,AHSG,AKAP8,AKT1,ANAPC11,ARPP19,AXL,BCIP1,BRAP,BRCA2,BRD2,BUB3,CCP110,CCT4,Cdc4     | 89          |
| Cell Death and Survival,Organismal Injury and Abnormalities                                        | Necrosis of vascular endothelial cells           | 3,23E-03 |                            | 0,513              | ACVRL1,AKT1,ANGPT1,ARHGAP18,ATP1B3,AXL,BCL2L1,CASP1,CAT,CAV1,CD274,EFEMP2,FOXO3,LGAL       | 24          |
| Cancer,Organismal Injury and Abnormalities,Reproductive System Disease                             | Metastatic HER2-negative breast cancer           | 3,29E-03 |                            |                    | AKT1,BRCA2,CD274,CHD1,FKBP1A,PARP2,PARP3,STAT1,TUBA1A,TUBA1C,TUBB3,TUBB4A,VEGFA            | 13          |
| Hereditary Disorder,Organismal Injury and Abnormalities,Skeletal and Muscular Disorders            | Autosomal recessive myopathy                     | 3,35E-03 |                            |                    | AP4S1,CFL2,COL6A1,COL6A2,COX15,CYP1B1,DAG1,DDHD1,DDHD2,DPAGT1,DPM3,GBA2,HADHA,HAD          | 41          |
| Cardiovascular Disease,Hematological Disease,Organismal Injury and Abnormalities                   | Anemia                                           | 3,39E-03 | Increased                  | 2,008              | AGO2,AKT1,AXL,BCL2L1,BRCA2,BRD1,CAT,CCND3,Cdc42,DAD1,DDX41,DFFB,FKBP1A,FLI1,FOXO3,GIM      | 80          |
| Cell Death and Survival,Organismal Injury and Abnormalities                                        | Apoptosis of vascular endothelial cells          | 3,41E-03 |                            | 0,363              | ACVRL1,AKT1,ANGPT1,ARHGAP18,ATP1B3,AXL,BCL2L1,CASP1,CAT,CAV1,CD274,EFEMP2,FOXO3,LGAL       | 22          |
| Cancer,Organismal Injury and Abnormalities,Reproductive System Disease                             | Recurrent endometrial carcinosarcoma             | 3,47E-03 |                            |                    | CD274,PARP2,PARP3,TUBA1A,TUBA1C,TUBB3,TUBB4A                                               | 7           |
| Cancer,Organismal Injury and Abnormalities,Reproductive System Disease                             | Primary HER2 negative invasive breast carcinoma  | 3,47E-03 |                            |                    | CD274,PARP2,PARP3,TUBA1A,TUBA1C,TUBB3,TUBB4A                                               | 7           |
| Cancer,Organismal Injury and Abnormalities,Respiratory Disease                                     | ALK rearrangement positive CD274 positive non-   | 3,47E-03 |                            |                    | ATIC,CD274,TUBA1A,TUBA1C,TUBB3,TUBB4A,VEGFA                                                | 7           |
| Cancer,Organismal Injury and Abnormalities,Respiratory Disease                                     | Stage IV CD274 low expression positive non-squa  | 3,47E-03 |                            |                    | ATIC,CD274,TUBA1A,TUBA1C,TUBB3,TUBB4A,VEGFA                                                | 7           |
| Cancer,Hereditary Disorder,Organismal Injury and Abnormalities,Reproductive System Disease         | Triple-negative familial breast cancer           | 3,47E-03 |                            |                    | AKT1,PARP2,PARP3,TUBA1A,TUBA1C,TUBB3,TUBB4A                                                | 7           |



| Categories                                                                                          | Diseases or Functions Annotation                   | p-value  | Predicted Activation State | Activation z-score | Molecules                                                                              | # Molecules |
|-----------------------------------------------------------------------------------------------------|----------------------------------------------------|----------|----------------------------|--------------------|----------------------------------------------------------------------------------------|-------------|
| Cancer,Organismal Injury and Abnormalities,Respiratory Disease                                      | Stage IV CD274 overexpression positive non-squa    | 3,47E-03 |                            |                    | ATIC,CD274,TUBA1A,TUBA1C,TUBB3,TUBB4A,VEGFA                                            | 7           |
| Cancer,Endocrine System Disorders,Organismal Injury and Abnormalities,Reproductive System Diseases  | Locally advanced triple negative breast adenocarci | 3,48E-03 |                            |                    | AKT1,CD274,TUBA1A,TUBA1C,TUBB3,TUBB4A                                                  | 6           |
| Cancer,Organismal Injury and Abnormalities,Reproductive System Disease                              | Unresectable triple negative breast adenocarcino   | 3,48E-03 |                            |                    | AKT1,CD274,TUBA1A,TUBA1C,TUBB3,TUBB4A                                                  | 6           |
| Cell Cycle,Embryonic Development                                                                    | Arrest in G2/M phase of embryonic cell lines       | 3,48E-03 |                            |                    | CDKN1B,OGT,PPP2CA,PPP2CB,RASSF1,RBBP6                                                  | 6           |
| Cancer,Organismal Injury and Abnormalities                                                          | Primary advanced cancer                            | 3,53E-03 |                            |                    | CD274,CHD1,PARP2,PARP3,TUBA1A,TUBA1C,TUBB3,TUBB4A,VEGFA                                | 9           |
| Cancer,Organismal Injury and Abnormalities                                                          | Primary peritoneal cancer                          | 3,58E-03 |                            |                    | ANGPT1,ATIC,BRCA2,CD274,CHD1,MAP2K2,MAPK1,PARP2,PARP3,TUBA1A,TUBA1C,TUBB3,TUBB4A,VE    | 14          |
| Cancer,Endocrine System Disorders,Organismal Injury and Abnormalities,Reproductive System Diseases  | Recurrent ovarian cancer                           | 3,62E-03 |                            |                    | BRCA2,CD274,MAP2K2,MAPK1,PARP2,PARP3,TUBA1A,TUBA1C,TUBB3,TUBB4A,VEGFA                  | 11          |
| Cancer,Organismal Injury and Abnormalities,Reproductive System Disease                              | Metastatic HER2 negative hormone receptor neg:     | 3,62E-03 |                            |                    | AKT1,BRCA2,CD274,CHD1,PARP2,PARP3,STAT1,TUBA1A,TUBA1C,TUBB3,TUBB4A                     | 11          |
| Cancer,Organismal Injury and Abnormalities,Reproductive System Disease                              | Stage IV hormone receptor positive advanced bre    | 3,65E-03 |                            |                    | CHD1,FKBP1A,PARP2,PARP3,TUBA1A,TUBA1C,TUBB3,TUBB4A,VEGFA                               | 10          |
| Cancer,Organismal Injury and Abnormalities,Reproductive System Disease                              | Invasive estrogen receptor positive progesterone   | 3,65E-03 |                            |                    | CHD1,FKBP1A,PARP2,PARP3,TUBA1A,TUBA1C,TUBB3,TUBB4A,VEGFA                               | 10          |
| Cancer,Inflammatory Disease,Inflammatory Response,Organismal Injury and Abnormalities,Reproduc      | Inflammatory breast cancer                         | 3,65E-03 |                            |                    | CD274,CHD1,FKBP1A,NOTCH3,PARP2,PARP3,TUBA1A,TUBA1C,TUBB3,TUBB4A                        | 10          |
| Cancer,Organismal Injury and Abnormalities,Reproductive System Disease                              | Recurrent estrogen receptor positive progester     | 3,65E-03 |                            |                    | CHD1,FKBP1A,PARP2,PARP3,TUBA1A,TUBA1C,TUBB3,TUBB4A,VEGFA                               | 10          |
| Developmental Disorder,Hereditary Disorder,Organismal Injury and Abnormalities,Skeletal and Muscu   | Progressive muscular dystrophy                     | 3,81E-03 |                            |                    | ACE,ADRA1A,ASPN,BGN,CELF2,COL6A1,COL6A2,CYB561,DAG1,DPAGT1,DPM3,HLA-A,HNRNPDL,LOXL1    | 27          |
| Cellular Compromise                                                                                 | Breakage of sister chromatids                      | 3,82E-03 |                            |                    | CDKN1B,PARP2,UIMC1                                                                     | 3           |
| Cell Cycle                                                                                          | Arrest in M phase of kidney cell lines             | 3,82E-03 |                            |                    | FBXO5,NEK9,RASSF1                                                                      | 3           |
| Hematological System Development and Function,Lymphoid Tissue Structure and Development,Tissu       | Quantity of natural T-regulatory cells             | 3,82E-03 |                            |                    | RICTOR,TGFBF1,TSC1                                                                     | 3           |
| Neurological Disease                                                                                | Degeneration of dorsal root ganglion               | 3,82E-03 |                            |                    | ABCD2,AKT1,VTI1B                                                                       | 3           |
| Cellular Development,Cellular Growth and Proliferation                                              | Expansion of pheochromocytoma cell lines           | 3,82E-03 |                            |                    | AKT1,HRAS,RAC1                                                                         | 3           |
| Cellular Movement                                                                                   | Invasion by Salmonella typhimurium SL1344          | 3,82E-03 |                            |                    | Cdc42,NOD2,RAC1                                                                        | 3           |
| Cell-To-Cell Signaling and Interaction                                                              | Detachment of fibroblast cell lines                | 3,82E-03 |                            |                    | FLNA,MAPK1,MYC                                                                         | 3           |
| Developmental Disorder,Hereditary Disorder,Organismal Injury and Abnormalities,Skeletal and Muscu   | Myotonic dystrophy type 2                          | 3,82E-03 |                            |                    | CNND3,CNBP,DDX5                                                                        | 3           |
| Cell Death and Survival,Cell Morphology,Cellular Function and Maintenance                           | Permeability of lung cell lines                    | 3,82E-03 |                            |                    | ANGPT1,ARHGAP35,RAC1                                                                   | 3           |
| Cancer,Organismal Injury and Abnormalities                                                          | Stage II-IV BRCA1 mutation negative BRCA2 muta     | 3,82E-03 |                            |                    | PARP2,PARP3,VEGFA                                                                      | 3           |
| Cancer,Endocrine System Disorders,Hereditary Disorder,Organismal Injury and Abnormalities,Reprod    | Stage II-IV BRCA1 germline mutation positive epit  | 3,82E-03 |                            |                    | PARP2,PARP3,VEGFA                                                                      | 3           |
| Cancer,Endocrine System Disorders,Hereditary Disorder,Organismal Injury and Abnormalities,Reprod    | Stage II-IV BRCA2 germline mutation positive epit  | 3,82E-03 |                            |                    | PARP2,PARP3,VEGFA                                                                      | 3           |
| Cancer,Hereditary Disorder,Organismal Injury and Abnormalities                                      | Stage II-IV primary BRCA1 germline mutation pos    | 3,82E-03 |                            |                    | PARP2,PARP3,VEGFA                                                                      | 3           |
| Cancer,Hereditary Disorder,Organismal Injury and Abnormalities,Reproductive System Disease          | Stage II-IV BRCA2 germline mutation positive fallc | 3,82E-03 |                            |                    | PARP2,PARP3,VEGFA                                                                      | 3           |
| Cancer,Organismal Injury and Abnormalities                                                          | BRCA rearrangement positive peritoneal cancer      | 3,82E-03 |                            |                    | PARP2,PARP3,VEGFA                                                                      | 3           |
| Cancer,Organismal Injury and Abnormalities,Reproductive System Disease                              | Stage II-IV BRCA2 somatic mutation positive falloj | 3,82E-03 |                            |                    | PARP2,PARP3,VEGFA                                                                      | 3           |
| Cancer,Organismal Injury and Abnormalities                                                          | Stage II-IV BRCA2 somatic mutation positive perit  | 3,82E-03 |                            |                    | PARP2,PARP3,VEGFA                                                                      | 3           |
| Cancer,Organismal Injury and Abnormalities,Reproductive System Disease                              | BRCA rearrangement positive fallopian tube canc    | 3,82E-03 |                            |                    | PARP2,PARP3,VEGFA                                                                      | 3           |
| Cancer,Hereditary Disorder,Organismal Injury and Abnormalities,Reproductive System Disease          | Stage II-IV BRCA1 germline mutation positive fallc | 3,82E-03 |                            |                    | PARP2,PARP3,VEGFA                                                                      | 3           |
| Cancer,Hereditary Disorder,Organismal Injury and Abnormalities                                      | Stage II-IV primary BRCA2 germline mutation pos    | 3,82E-03 |                            |                    | PARP2,PARP3,VEGFA                                                                      | 3           |
| Cancer,Endocrine System Disorders,Organismal Injury and Abnormalities,Reproductive System Disea     | Stage II-IV BRCA1 somatic mutation positive epit   | 3,82E-03 |                            |                    | PARP2,PARP3,VEGFA                                                                      | 3           |
| Lipid Metabolism,Molecular Transport,Small Molecule Biochemistry                                    | Uptake of lauric acid                              | 3,82E-03 |                            |                    | CAV1,EHD2,SLC27A4                                                                      | 3           |
| Cancer,Organismal Injury and Abnormalities                                                          | Stage II-IV BRCA1 somatic mutation positive perit  | 3,82E-03 |                            |                    | PARP2,PARP3,VEGFA                                                                      | 3           |
| Cancer,Organismal Injury and Abnormalities,Reproductive System Disease                              | Stage II-IV BRCA1 somatic mutation positive falloj | 3,82E-03 |                            |                    | PARP2,PARP3,VEGFA                                                                      | 3           |
| Cancer,Endocrine System Disorders,Organismal Injury and Abnormalities,Reproductive System Disea     | Stage II-IV BRCA2 somatic mutation positive epit   | 3,82E-03 |                            |                    | PARP2,PARP3,VEGFA                                                                      | 3           |
| Cancer,Endocrine System Disorders,Organismal Injury and Abnormalities,Reproductive System Disea     | BRCA rearrangement positive ovarian cancer         | 3,82E-03 |                            |                    | PARP2,PARP3,VEGFA                                                                      | 3           |
| Cellular Movement,Hematological System Development and Function,Immune Cell Trafficking,Inflam      | Migration of dermal dendritic cells                | 3,82E-03 |                            |                    | Cdc42,LGALS1,RAMP1                                                                     | 3           |
| Infectious Diseases                                                                                 | Replication of Myxoma virus                        | 3,82E-03 |                            |                    | DHX9,IFNAR1,STAT1                                                                      | 3           |
| Hematological System Development and Function,Immunological Disease,Lymphoid Tissue Structure       | Abnormal morphology of enlarged submandibula       | 3,82E-03 |                            |                    | ATP2B4,TOPIB,TRAF3IP2                                                                  | 3           |
| Cell Cycle                                                                                          | Interphase                                         | 3,92E-03 |                            | -0,338             | ACIN1,ACVRL1,ADRA1A,AFAP1L2,AKT1,ANGPT1,Anp32b,ARPP19,ATF5,AXL,BAD,BAG3,BCL2L1,Calm1 ( | 124         |
| Cancer,Endocrine System Disorders,Organismal Injury and Abnormalities                               | Adrenal cortex adenoma                             | 4,00E-03 |                            |                    | ALDH5A1,ASPN,BGN,COL6A1,COL6A2,DAD1,DDOST,EFEMP2,FLNC,MGAT1,OSTC,PRLP,PRKAR1A,RHO      | 17          |
| Cell Cycle,Cellular Development,Connective Tissue Development and Function                          | Senescence of fibroblast cell lines                | 4,11E-03 |                            | -0,925             | AKT1,BCL2L12,BRD7,BUB3,CAV1,CIRBP,DPY30,Ewrs1,GPATCH8,HRAS,KDM2A,MAPK1,MORC3,MYC,NE    | 29          |
| Cell Death and Survival                                                                             | Apoptosis of vascular cells                        | 4,11E-03 |                            | 0,543              | ACE2,ACVRL1,AKT1,ANGPT1,ARHGAP18,ATP1B3,AXL,BCL2L1,CASP1,CAT,CAV1,CD274,EEF1D,EFEMP2,  | 29          |
| Cancer,Organismal Injury and Abnormalities,Reproductive System Disease                              | Recurrent breast carcinoma                         | 4,13E-03 |                            |                    | AKT1,CD274,FKBP1A,TUBA1A,TUBA1C,TUBB3,TUBB4A,VEGFA                                     | 8           |
| Cancer,Endocrine System Disorders,Organismal Injury and Abnormalities,Reproductive System Disea     | Low-grade serous ovarian adenocarcinoma            | 4,13E-03 |                            |                    | MAP2K2,MAPK1,PARP2,PARP3,TUBA1A,TUBA1C,TUBB3,TUBB4A                                    | 8           |
| Cancer,Organismal Injury and Abnormalities,Reproductive System Disease                              | Primary HER2 negative invasive breast cancer       | 4,13E-03 |                            |                    | CD274,CHD1,PARP2,PARP3,TUBA1A,TUBA1C,TUBB3,TUBB4A                                      | 8           |
| Cancer,Organismal Injury and Abnormalities                                                          | Recurrent primary peritoneal cancer                | 4,13E-03 |                            |                    | CD274,PARP2,PARP3,TUBA1A,TUBA1C,TUBB3,TUBB4A,VEGFA                                     | 8           |
| Cancer,Organismal Injury and Abnormalities                                                          | Advanced primary peritoneal cancer                 | 4,13E-03 |                            |                    | CD274,PARP2,PARP3,TUBA1A,TUBA1C,TUBB3,TUBB4A,VEGFA                                     | 8           |
| Gene Expression                                                                                     | Transcription of DNA                               | 4,30E-03 |                            | -0,312             | ACTR3,ACVRL1,AFAP1L2,AGO1,AGO2,AKAP8L,AKT1,ARF4,ASXL2,ATAD2,ATF5,ATN1,ATP2B4,BCL2L12,I | 228         |
| Organismal Injury and Abnormalities                                                                 | Benign lesion                                      | 4,33E-03 |                            | 0,031              | ACE,ADAM12,ADRA1A,AIG1,AKAP8L,AKT1,ALDH5A1,ANAPC10,ANGPT1,ANTXR1,ANXA5,ARHGDI3,ASP     | 174         |
| Cancer,Organismal Injury and Abnormalities,Reproductive System Disease                              | Advanced estrogen receptor positive breast canc    | 4,36E-03 |                            |                    | CHD1,FKBP1A,HDAC10,PARP2,PARP3,TUBA1A,TUBA1C,TUBB3,TUBB4A,VEGFA                        | 11          |
| Cardiovascular System Development and Function,Cell Morphology,Cellular Development,Organismal      | Tubulation of endothelial cell lines               | 4,36E-03 |                            | 0,602              | CASP1,CAVIN2,CDH5,CLIC4,CXCL10,ORAI1,PRKACB,RAP1A,SETD2,STIM1,VEGFA                    | 11          |
| Cell Death and Survival,Gastrointestinal Disease,Hepatic System Disease,Organismal Injury and Abnor | Cell death of liver cell lines                     | 4,47E-03 |                            | 0,431              | AKT1,BAD,BCL2L1,FOXO3,LAMP2,LAPTM4B,MYC,TIMP1,TNFSF10,TNFSF12                          | 10          |
| Cancer,Dermatological Diseases and Conditions,Organismal Injury and Abnormalities                   | Development of skin tumor                          | 4,49E-03 |                            | 0,543              | AKT1,BRCA2,CASP1,CNND3,CLIC4,GSTM1,HRAS,IL17RC,OAZ1,RAC1,RHEB,SMO,SPINT2,TRAF3IP2,VEGF | 16          |
| Infectious Diseases                                                                                 | Infection of cells                                 | 4,53E-03 | Decreased                  | -4,514             | ACE2,ACTR3,AFG3L2,AKT1,ALKBH3,ANKRD6,AP2A1,APOEB3C8,ASXL2,ATG16L2,ATP6V0A1,ATP6V0D1,   | 126         |
| Cell Death and Survival,Skeletal and Muscular Disorders                                             | Apoptosis of smooth muscle cell lines              | 4,54E-03 |                            | 1,387              | IRF1,NOTCH3,RAC1,TNFRSF10A,TNFSF10                                                     | 5           |
| Cell Morphology                                                                                     | Polarization of leukemia cell lines                | 4,54E-03 |                            | 0                  | AHSG,DPLYSL2,IGSF8,RAC1,RICTOR                                                         | 5           |
| Tissue Development                                                                                  | Formation of elastic fibers                        | 4,54E-03 |                            |                    | EFEMP2,FBLN5,LOXL1,LTBP4,MFAP4                                                         | 5           |
| Cell Cycle                                                                                          | Exit from G1 phase                                 | 4,54E-03 |                            |                    | CDKN1B,CSNK2B,MYC,RASSF1,RBM5                                                          | 5           |
| Cardiovascular System Development and Function,Cell Morphology,Organismal Development               | Sprouting of capillary vessel                      | 4,54E-03 |                            | 0                  | ACVRL1,CAT,CD63,TGFB1BP1,VEGFA                                                         | 5           |
| Cancer,Organismal Injury and Abnormalities                                                          | Initiation of formation of tumor                   | 4,54E-03 |                            |                    | FOXC2,FTO,HRAS,MYC,SMO                                                                 | 5           |
| Cancer,Organismal Injury and Abnormalities,Tissue Morphology                                        | Quantity of tumor                                  | 4,65E-03 |                            | -0,291             | AKT1,ARL6IP5,ATAD3A,BMPR2,BRCA2,CAV1,CD151,CDKN1B,Cdkn1c,CYP11B1,EIF4EBP2,FOXC2,FOXO1, | 36          |
| Cancer,Hereditary Disorder,Organismal Injury and Abnormalities                                      | BRCA2 germline mutation positive cancer            | 4,65E-03 |                            |                    | PARP2,PARP3,TUBA1A,TUBA1C,TUBB3,TUBB4A,VEGFA                                           | 7           |



| Categories                                                                                         | Diseases or Functions Annotation                 | p-value  | Predicted Activation State | Activation z-score | Molecules                                                                                | # Molecules |
|----------------------------------------------------------------------------------------------------|--------------------------------------------------|----------|----------------------------|--------------------|------------------------------------------------------------------------------------------|-------------|
| Cancer,Hereditary Disorder,Organismal Injury and Abnormalities                                     | BRCA1 germline mutation positive cancer          | 4,65E-03 |                            |                    | PARP2,PARP3,TUBA1A,TUBA1C,TUBB3,TUBB4A,VEGFA                                             | 7           |
| Cancer,Organismal Injury and Abnormalities                                                         | BRCA germline mutation negative cancer           | 4,65E-03 |                            |                    | PARP2,PARP3,TUBA1A,TUBA1C,TUBB3,TUBB4A,VEGFA                                             | 7           |
| Cell Death and Survival                                                                            | Cell death of fibroblast cell lines              | 4,73E-03 |                            | -0,026             | ADAM12,AIFM1,AKT1,ATN1,BAD,BCL2L1,BRCA2,C1orf159,CA3,CAPNS1,CDKN1B,Cdkn1c,CLIC4,DNAJA1   | 74          |
| Cancer,Organismal Injury and Abnormalities,Reproductive System Disease                             | Invasive ductal breast carcinoma                 | 4,78E-03 |                            |                    | BCCIP,BCL2L1,BGN,BRCA2,CCND3,CD274,CHD1,ELP3,HSPB8,LGALS1,LTBP4,MKI67,PTPRF,RASSF1,RELA  | 24          |
| Cell Death and Survival                                                                            | Cell death of tumor cell lines                   | 4,79E-03 |                            | 1,597              | ADRM1,AGO1,AIFM1,AKT1,AKT1S1,ALKBH3,ANXA5,ARHGDI1,ATAD2,ATF5,ATN1,ATP1B3,AVP1,AXL,B      | 252         |
| Cancer,Organismal Injury and Abnormalities,Reproductive System Disease                             | Recurrent breast cancer                          | 4,83E-03 |                            |                    | AKT1,CD274,CHD1,FKBP1A,HDAC10,PARP2,PARP3,RRAS2,TUBA1A,TUBA1C,TUBB3,TUBB4A,VEG           | 14          |
| Cell Death and Survival                                                                            | Cell death of lung cell lines                    | 4,91E-03 | Increased                  | 2,182              | AFAP1L2,AKT1,BCL2L1,CDKN1B,CLK2,HRAS,IFNAR1,MAP3K5,MYC,TNFAIP3,TNFSF10,TXN               | 12          |
| Cancer,Endocrine System Disorders,Organismal Injury and Abnormalities,Reproductive System Diseases | Advanced stage HER2-negative breast cancer       | 4,91E-03 |                            |                    | AKT1,CD274,CHD1,FKBP1A,PARP2,PARP3,TUBA1A,TUBA1C,TUBB3,TUBB4A,VEGFA                      | 12          |
| Cancer,Organismal Injury and Abnormalities,Reproductive System Disease                             | Recurrent HER2-negative breast cancer            | 4,91E-03 |                            |                    | AKT1,CD274,CHD1,FKBP1A,PARP2,PARP3,TUBA1A,TUBA1C,TUBB3,TUBB4A,VEGFA                      | 12          |
| Cancer,Endocrine System Disorders,Organismal Injury and Abnormalities,Reproductive System Diseases | Stage III-IV high-grade serous ovarian carcinoma | 4,92E-03 |                            |                    | CD274,PARP2,TUBA1A,TUBA1C,TUBB3,TUBB4A                                                   | 6           |
| Cancer,Neurological Disease,Organismal Injury and Abnormalities                                    | 1p/19q co-deletion anaplastic glioma             | 4,92E-03 |                            |                    | IDH1,IDH2,TUBA1A,TUBA1C,TUBB3,TUBB4A                                                     | 6           |
| Cancer,Endocrine System Disorders,Organismal Injury and Abnormalities,Reproductive System Diseases | Stage III-IV advanced ovarian carcinoma          | 4,92E-03 |                            |                    | CD274,PARP2,TUBA1A,TUBA1C,TUBB3,TUBB4A                                                   | 6           |
| Cancer,Organismal Injury and Abnormalities,Reproductive System Disease                             | TNM stage T1-4 non-metastatic breast cancer      | 4,92E-03 |                            |                    | PARP2,PARP3,TUBA1A,TUBA1C,TUBB3,TUBB4A                                                   | 6           |
| Cancer,Dermatological Diseases and Conditions,Hereditary Disorder,Metabolic Disease,Organismal In  | Xeroderma pigmentosum                            | 4,92E-03 |                            |                    | ERCC1,ERCC2,ERCC5,ERCC6,GTPBP2,SMO                                                       | 6           |
| Cancer,Organismal Injury and Abnormalities,Tumor Morphology                                        | Progressive PIK3CA mutation positive solid tumor | 4,92E-03 |                            |                    | AKT1,FKBP1A,TUBA1A,TUBA1C,TUBB3,TUBB4A                                                   | 6           |
| Cancer,Organismal Injury and Abnormalities                                                         | PTEN mutation positive solid tumor               | 4,92E-03 |                            |                    | AKT1,FKBP1A,TUBA1A,TUBA1C,TUBB3,TUBB4A                                                   | 6           |
| Cancer,Neurological Disease,Organismal Injury and Abnormalities                                    | 1p/19q co-deletion positive oligodendroglioma    | 4,92E-03 |                            |                    | IDH1,IDH2,TUBA1A,TUBA1C,TUBB3,TUBB4A                                                     | 6           |
| Cancer,Organismal Injury and Abnormalities                                                         | Low grade serous peritoneal adenocarcinoma       | 4,92E-03 |                            |                    | MAP2K2,MAPK1,TUBA1A,TUBA1C,TUBB3,TUBB4A                                                  | 6           |
| Cancer,Organismal Injury and Abnormalities                                                         | Stage IV endometrioid cancer                     | 4,92E-03 |                            |                    | PARP2,PARP3,TUBA1A,TUBA1C,TUBB3,TUBB4A                                                   | 6           |
| Cancer,Endocrine System Disorders,Organismal Injury and Abnormalities,Reproductive System Diseases | Stage III-IV ovarian endometrioid carcinoma      | 4,92E-03 |                            |                    | PARP2,PARP3,TUBA1A,TUBA1C,TUBB3,TUBB4A                                                   | 6           |
| Cancer,Endocrine System Disorders,Organismal Injury and Abnormalities,Reproductive System Diseases | Ovarian serous carcinosarcoma                    | 4,92E-03 |                            |                    | CD274,PARP2,TUBA1A,TUBA1C,TUBB3,TUBB4A                                                   | 6           |
| Cancer,Endocrine System Disorders,Organismal Injury and Abnormalities,Reproductive System Diseases | High grade advanced serous ovarian adenocarcin   | 4,92E-03 |                            |                    | CD274,PARP2,TUBA1A,TUBA1C,TUBB3,TUBB4A                                                   | 6           |
| Cancer,Organismal Injury and Abnormalities,Respiratory Disease                                     | Recurrent EGFR sensitizing mutation positive non | 4,92E-03 |                            |                    | CD274,TUBA1A,TUBA1C,TUBB3,TUBB4A,VEGFA                                                   | 6           |
| Cancer,Hereditary Disorder,Organismal Injury and Abnormalities                                     | Hereditary cancer                                | 5,03E-03 |                            |                    | AKT1,AXIN2,AXL,BCL2L1,BRCA2,CD274,CHIC2,DDX41,EHBP1,EPHB2,ERCC2,ERCC6,FBXO11,FLCN,HNRN   | 40          |
| Cancer,Endocrine System Disorders,Organismal Injury and Abnormalities                              | Secreting adrenocortical adenoma                 | 5,11E-03 |                            |                    | ALDH5A1,ASPN,BGN,COL6A1,COL6A2,DAD1,DDOST,EFEMP2,FLNC,MGAT1,OSTC,PRLP,RHOC,RPN2,S1       | 16          |
| Cell Death and Survival                                                                            | Apoptosis of breast cell lines                   | 5,11E-03 |                            | 0,834              | AKT1,BAD,CDKN1B,DYNLL1,FOXO3,HRAS,IRF1,ITGA5,LIMS1,MAP3K5,MAPK1,MYC,TGFBF1,TIMP1,TNF:    | 16          |
| Cancer,Organismal Injury and Abnormalities,Reproductive System Disease                             | Luminal breast carcinoma                         | 5,22E-03 |                            |                    | AKT1,BRCA2,EIF2S2,EIF6,PARP2,PARP3,SF3B1,TUBA1A,TUBA1C,TUBB3,TUBB4A                      | 11          |
| Metabolic Disease,Organismal Injury and Abnormalities                                              | Oxidative phosphorylation deficiency             | 5,22E-03 |                            |                    | AIFM1,COX15,GATB,GFMI1,GFMD2,MRPL3,MTFMT,PNPT1,SLC25A26,TARS2,TRIT1                      | 11          |
| Cancer,Organismal Injury and Abnormalities,Reproductive System Disease                             | Hormone receptor-positive HER2-negative breast   | 5,22E-03 |                            |                    | AKT1,BRCA2,CHD1,FKBP1A,PARP2,PARP3,TUBA1A,TUBA1C,TUBB3,TUBB4A,VEGFA                      | 11          |
| Cancer,Organismal Injury and Abnormalities,Reproductive System Disease                             | Metastatic hormone receptor positive breast can  | 5,22E-03 |                            |                    | AKT1,CD274,FKBP1A,HDAC10,PARP2,PARP3,TUBA1A,TUBA1C,TUBB3,TUBB4A,VEGFA                    | 11          |
| Cancer,Organismal Injury and Abnormalities,Reproductive System Disease                             | Recurrent hormone receptor positive HER2 negat   | 5,22E-03 |                            |                    | AKT1,CHD1,FKBP1A,PARP2,PARP3,TUBA1A,TUBA1C,TUBB3,TUBB4A,VEGFA                            | 11          |
| Dermatological Diseases and Conditions,Organismal Injury and Abnormalities                         | Psoriatic lesion                                 | 5,23E-03 |                            |                    | BCL2L1,KRT18,STIM1,TNIP1                                                                 | 4           |
| Cell Cycle                                                                                         | S phase of hematopoietic cell lines              | 5,23E-03 |                            |                    | CCND3,MAP3K8,PNPT1,RBM5                                                                  | 4           |
| Cancer,Organismal Injury and Abnormalities                                                         | Grade 2-3 endometrioid peritoneal cancer         | 5,23E-03 |                            |                    | CD274,PARP2,PARP3,VEGFA                                                                  | 4           |
| Cancer,Organismal Injury and Abnormalities,Reproductive System Disease                             | Grade 2-3 endometrioid fallopian tube cancer     | 5,23E-03 |                            |                    | CD274,PARP2,PARP3,VEGFA                                                                  | 4           |
| Cancer,Cell Death and Survival,Organismal Injury and Abnormalities,Tumor Morphology                | Apoptosis of pancreatic cancer cells             | 5,23E-03 |                            |                    | CASP1,EIF3F,IRF1,TNFSF10                                                                 | 4           |
| Cardiovascular System Development and Function                                                     | Proliferation of vessel                          | 5,23E-03 |                            |                    | AKT1,ANGPT1,FOXO1,PF4                                                                    | 4           |
| Dermatological Diseases and Conditions,Developmental Disorder,Hereditary Disorder,Metabolic Dise   | Cockayne syndrome                                | 5,23E-03 |                            |                    | ERCC1,ERCC2,ERCC5,ERCC6                                                                  | 4           |
| Lipid Metabolism,Molecular Transport,Small Molecule Biochemistry,Vitamin and Mineral Metabolism    | Quantity of 11-cis-retinal                       | 5,23E-03 |                            | -1                 | CR1L,MAPK1,SLC27A4,VEGFA                                                                 | 4           |
| Cell Cycle                                                                                         | Arrest in interphase of kidney cell lines        | 5,27E-03 |                            |                    | CCND3,CDKN1B,MYC,OGT,PPP2CA,PPP2CB,RASSF1,RBBP6                                          | 8           |
| Infectious Diseases                                                                                | Infection of fibroblast cell lines               | 5,27E-03 |                            | -1,132             | APOBEC3B,DAG1,HRAS,IFNAR1,IKBKE,MXRAB,RP56KB2,TBK1                                       | 8           |
| Cell Cycle                                                                                         | G1 phase of connective tissue cells              | 5,49E-03 |                            | -1,387             | Cdc42,CDKN1B,CRKL,FOXO2,HRAS,MAP3K5,MAPK1,MYC,RAC1                                       | 9           |
| Cancer,Organismal Injury and Abnormalities,Reproductive System Disease                             | Locally advanced mammary tumor                   | 5,49E-03 |                            |                    | AKT1,CD274,CHD1,FKBP1A,PARP2,TUBA1A,TUBA1C,TUBB3,TUBB4A                                  | 9           |
| Cell Death and Survival                                                                            | Apoptosis of tumor cell lines                    | 5,52E-03 |                            | 1,511              | AGO1,AIFM1,AKT1,AKT1S1,ALKBH3,ANXA5,ARHGDI1,ATAD2,ATF5,ATN1,ATP1B3,BAD,BAG3,BCL2L1,B     | 201         |
| Cancer,Organismal Injury and Abnormalities,Reproductive System Disease                             | Invasive breast carcinoma                        | 5,53E-03 |                            |                    | AKT1,ATAD2,BCCIP,BCL2L1,BGN,BRCA2,CCND3,CD274,CHD1,CXCL10,DNM1L,ELP3,FBLN5,FKBP1A,FOX    | 45          |
| Cancer,Hematological Disease,Organismal Injury and Abnormalities                                   | Primary myelofibrosis                            | 5,64E-03 |                            |                    | AKT1,ANGPT1,ARHGAP18,BCL2L1,BMPR2,BRWD1,CD9,FOXO1,IDH1,IDH2,ITGA5,ITGB3,JARID2,MYC,PF    | 19          |
| Dermatological Diseases and Conditions,Inflammatory Disease,Inflammatory Response,Organismal In    | Juvenile dermatomyositis                         | 5,77E-03 |                            |                    | ASPN,BGN,CELF2,COL6A1,COL6A2,CYB561,LOXL1,LTBP3,PLOD2,RASSF1,SDC2,SDCBP                  | 12          |
| Cancer,Organismal Injury and Abnormalities                                                         | Stage I epithelial cancer                        | 5,80E-03 |                            |                    | ACTR10,AGO1,AGO2,ATIC,CHD1,EEF1A1,FKBP1A,CLK10,RHOC,RPL7,RP511,RP52A4,SSR2,TUBA1A,TUB    | 17          |
| Cell Death and Survival                                                                            | Cell death of fibroblasts                        | 6,00E-03 |                            | 0,889              | AIFM1,AKT1,BAD,BCL2L1,CABLES2,CAPNS1,CASP1,CAT,Cdc42,CDKN1B,CHUK,CLIC4,CRKL,CYP1B1,EMD   | 48          |
| Cell Cycle                                                                                         | G2/M phase transition                            | 6,01E-03 |                            | -0,152             | ARPP19,ATF5,Calm1 (includes others),CCP110,CENPJ,CEP152,CEP290,CEP43,CNTRL,DYNLL1,FI     | 32          |
| Cell Cycle                                                                                         | Arrest in interphase                             | 6,02E-03 |                            |                    | ACIN1,ACVRL1,ADRA1A,AKT1,ATF5,AXL,BAD,BAG3,BCL2L1,CAMK2N1,CAT,CAV1,CCND3,CDKN1B,Cdkn     | 75          |
| Cancer,Organismal Injury and Abnormalities                                                         | High grade BRCA2 mutation positive peritoneal c: | 6,12E-03 |                            |                    | CD274,PARP2,PARP3,TUBA1A,TUBA1C,TUBB3,TUBB4A                                             | 7           |
| Cancer,Endocrine System Disorders,Organismal Injury and Abnormalities,Reproductive System Diseases | Relapsed BRCA1 mutation positive serous ovaria   | 6,12E-03 |                            |                    | CD274,PARP2,PARP3,TUBA1A,TUBA1C,TUBB3,TUBB4A                                             | 7           |
| Cancer,Organismal Injury and Abnormalities                                                         | BRCA somatic mutation positive solid tumor       | 6,12E-03 |                            |                    | CD274,PARP2,PARP3,TUBA1A,TUBA1C,TUBB3,TUBB4A                                             | 7           |
| Cancer,Organismal Injury and Abnormalities                                                         | High grade BRCA1 mutation positive peritoneal c: | 6,12E-03 |                            |                    | CD274,PARP2,PARP3,TUBA1A,TUBA1C,TUBB3,TUBB4A                                             | 7           |
| Cancer,Endocrine System Disorders,Organismal Injury and Abnormalities,Reproductive System Diseases | BRCA2 mutation positive serous ovarian adenoca   | 6,12E-03 |                            |                    | CD274,PARP2,PARP3,TUBA1A,TUBA1C,TUBB3,TUBB4A                                             | 7           |
| Cancer,Organismal Injury and Abnormalities,Reproductive System Disease                             | High grade BRCA2 mutation positive fallopian tub | 6,12E-03 |                            |                    | CD274,PARP2,PARP3,TUBA1A,TUBA1C,TUBB3,TUBB4A                                             | 7           |
| Cancer,Organismal Injury and Abnormalities,Reproductive System Disease                             | High grade BRCA1 mutation positive fallopian tub | 6,12E-03 |                            |                    | CD274,PARP2,PARP3,TUBA1A,TUBA1C,TUBB3,TUBB4A                                             | 7           |
| Cancer,Organismal Injury and Abnormalities                                                         | Invasive squamous-cell carcinoma                 | 6,12E-03 |                            |                    | CD274,SMAD4,TUBA1A,TUBA1C,TUBB3,TUBB4A,VEGFA                                             | 7           |
| Cancer,Endocrine System Disorders,Hereditary Disorder,Organismal Injury and Abnormalities,Reprod   | BRCA germline mutation positive serous ovarian : | 6,12E-03 |                            |                    | CD274,PARP2,PARP3,TUBA1A,TUBA1C,TUBB3,TUBB4A                                             | 7           |
| Cancer,Organismal Injury and Abnormalities,Respiratory Disease                                     | Stage IIIB-IV recurrent nonsquamous non-small c  | 6,12E-03 |                            |                    | ATIC,CD274,TUBA1A,TUBA1C,TUBB3,TUBB4A,VEGFA                                              | 7           |
| Organismal Injury and Abnormalities                                                                | Dyskeratosis congenita or aplastic anemia        | 6,12E-03 |                            |                    | BRCA2,CAT,DDX41,FKBP1A,GPX1,NHP2,PPP3R1,RPL18,RPL26,RPL35A,RPS10,RPS15A,RPS19,RPS        | 20          |
| Cancer,Organismal Injury and Abnormalities                                                         | Transitional-cell carcinoma                      | 6,19E-03 |                            |                    | AKT1,ARHGAP35,ASXL2,ATAD2,ATIC,AXIN2,AXL,BRCA2,CD274,CDKN1B,CLIP3,CSPG4,EIF4A2,ERCC2,FBI | 53          |
| Neurological Disease,Organismal Injury and Abnormalities                                           | Leukoencephalopathy                              | 6,30E-03 |                            |                    | ABCD2,AIFM1,CAV1,COX15,DEGS1,DLD,FLOT2,GOLPH3,HIKESH1,IARS2,LRPPRC,MTFMT,NUF51,PHYH      | 22          |
| Cardiovascular Disease,Organismal Injury and Abnormalities,Skeletal and Muscular Disorders         | Dilated or arrhythmic cardiomyopathy             | 6,36E-03 |                            |                    | ABCC9,ACE,ACE2,ADRA1A,AIFM1,ATP2A3,BAG3,BCL2L1,BGN,CAPNS1,CAV1,CEP85L,CITTA,DAG1,DNM:    | 48          |
| Cancer,Organismal Injury and Abnormalities,Respiratory Disease                                     | Stage I non-small cell lung carcinoma            | 6,40E-03 |                            |                    | ACTR10,AGO1,AGO2,ATIC,EEF1A1,RHOC,RPL7,RP511,RP52A4,SSR2,TUBA1A,TUBA1C,TUBB3,TUBB4A      | 14          |

| Categories                                                                                                                 | Diseases or Functions Annotation                    | p-value  | Predicted Activation State | Activation z-score | Molecules                                                                               | # Molecules |
|----------------------------------------------------------------------------------------------------------------------------|-----------------------------------------------------|----------|----------------------------|--------------------|-----------------------------------------------------------------------------------------|-------------|
| Cancer,Neurological Disease,Organismal Injury and Abnormalities                                                            | Development of astrocytoma                          | 6,40E-03 |                            |                    | AKT1,ALDH5A1,ANGPT1,CSPG4,HRAS,IDH1,IDH2,MAP2K2,OA2I1,TUBA1A,TUBA1C,TUBB3,TUBB4A,VEG    | 14          |
| Cancer,Endocrine System Disorders,Organismal Injury and Abnormalities,Reproductive System Diseases                         | Clear-cell ovarian carcinoma                        | 6,53E-03 |                            |                    | BRCA2,CD274,CLDN3,NOTCH3,PARP2,PARP3,PF4,PPP2R1A,SPINT2,STAT1,TUBA1A,TUBA1C,TUBB3,TUI   | 15          |
| Cancer,Organismal Injury and Abnormalities,Respiratory Disease                                                             | Stage I-II non-small cell lung cancer               | 6,53E-03 |                            |                    | ACTR10,AGO1,AGO2,ATIC,CD274,EEF1A1,RHOC,RPL7,RPS11,RPS27A,SSR2,TUBA1A,TUBA1C,TUBB3,TU   | 15          |
| Metabolic Disease,Organismal Injury and Abnormalities                                                                      | Combined oxidative phosphorylation deficiency       | 6,55E-03 |                            |                    | AIFM1,GATB,GFMI1,GFMI2,MRPL3,MTFMT,PNPT1,SLC25A26,TARS2,TRIT1                           | 10          |
| Connective Tissue Development and Function,Skeletal and Muscular System Development and Function                           | Attachment of rib                                   | 6,55E-03 |                            |                    | BMPR2,Cdkn1c,CHUK,DEAF1,GNAI2,GNAI3,LMO4,SF3B1,SLC29A1,WFIKKN2                          | 10          |
| Organ Morphology,Skeletal and Muscular System Development and Function                                                     | Morphology of skeletal muscle                       | 6,59E-03 |                            |                    | ADAM12,AKT1,CAV1,Cdkn1c,CFL2,CLIP3,COL6A1,DAG1,EIF2AK4,EMD,ERCC1,FLNC,FOXO1,HACD1,HAC   | 35          |
| Cancer,Organismal Injury and Abnormalities,Renal and Urological Disease                                                    | Urothelial cancer                                   | 6,62E-03 |                            |                    | AKT1,ARHGAP35,ASXL2,ATAD2,AXIN2,AXL,BRCA2,CCND3,CD274,CDKN1B,CITTA,CLIP3,CSPG4,DAD1,EIF | 55          |
| Cancer,Organismal Injury and Abnormalities                                                                                 | Stage I cancer                                      | 6,63E-03 |                            |                    | ACTR10,AGO1,AGO2,ATIC,CHD1,CYP11B1,EEF1A1,FKBP1A,IFNAR1,CLK10,MAP2K2,MDM4,PSMB1,PSME    | 23          |
| Cardiovascular Disease,Organismal Injury and Abnormalities,Respiratory Disease                                             | Primary pulmonary hypertension                      | 6,65E-03 |                            |                    | ACVRL1,BCL2L1,BMPR2,CAV1,EIF2AK4,FOXO1,PFKFB3,SMAD4                                     | 8           |
| Cancer,Organismal Injury and Abnormalities,Reproductive System Disease                                                     | Undifferentiated fallopian tube carcinoma           | 6,65E-03 |                            |                    | CD274,PARP2,PARP3,TUBA1A,TUBA1C,TUBB3,TUBB4A,VEGFA                                      | 8           |
| Cell Cycle,Embryonic Development                                                                                           | Arrest in G2 phase of embryonic cell lines          | 6,65E-03 |                            |                    | CDKN1B,CKS1B,OGT,PPP2CA,PPP2CB,RASSF1,RBBP6,REV1                                        | 8           |
| Cancer,Endocrine System Disorders,Organismal Injury and Abnormalities,Reproductive System Diseases                         | Stage IV HER2 negative hormone receptor negative    | 6,65E-03 |                            |                    | CD274,CHD1,TUBA1A,TUBA1C,TUBB3,TUBB4A,VEGFA                                             | 8           |
| Cancer,Endocrine System Disorders,Organismal Injury and Abnormalities,Reproductive System Diseases                         | Recurrent ovarian endometrioid carcinoma            | 6,65E-03 |                            |                    | CD274,PARP2,PARP3,TUBA1A,TUBA1C,TUBB3,TUBB4A,VEGFA                                      | 8           |
| Cancer,Endocrine System Disorders,Organismal Injury and Abnormalities,Reproductive System Diseases                         | Recurrent undifferentiated ovarian carcinoma        | 6,65E-03 |                            |                    | CD274,PARP2,PARP3,TUBA1A,TUBA1C,TUBB3,TUBB4A,VEGFA                                      | 8           |
| Cancer,Organismal Injury and Abnormalities,Respiratory Disease                                                             | Mixed cell non-small cell lung carcinoma            | 6,74E-03 |                            |                    | AKT1,ATIC,CD274,CSPG4,RPS15,TUBA1A,TUBA1C,TUBB3,TUBB4A                                  | 9           |
| Cancer,Organismal Injury and Abnormalities,Respiratory Disease                                                             | Stage IV stage IV lung squamous cell carcinoma      | 6,74E-03 |                            |                    | ATIC,CD274,PARP2,PARP3,TUBA1A,TUBA1C,TUBB3,TUBB4A,VEGFA                                 | 9           |
| Cancer,Organismal Injury and Abnormalities,Reproductive System Disease                                                     | HER2-negative breast carcinoma                      | 6,76E-03 |                            |                    | AKT1,BRCA2,CD274,CHD1,FKBP1A,PARP2,PARP3,TUBA1A,TUBA1C,TUBB3,TUBB4A,VEGFA               | 12          |
| Cancer,Organismal Injury and Abnormalities,Reproductive System Disease                                                     | Locally advanced breast cancer                      | 6,76E-03 |                            |                    | AKT1,CD274,CHD1,FKBP1A,HDAC10,PARP2,PARP3,TUBA1A,TUBA1C,TUBB3,TUBB4A                    | 12          |
| Cancer,Endocrine System Disorders,Organismal Injury and Abnormalities,Reproductive System Diseases                         | BRCA1 mutation negative BRCA2 mutation negative     | 6,76E-03 |                            |                    | PARP2,PARP3,TUBA1A,TUBA1C,TUBB3,TUBB4A                                                  | 6           |
| Cancer,Endocrine System Disorders,Organismal Injury and Abnormalities,Reproductive System Diseases                         | Stage 3C ovarian carcinoma                          | 6,76E-03 |                            |                    | CLK10,TUBA1A,TUBA1C,TUBB3,TUBB4A,VEGFA                                                  | 6           |
| Neurological Disease,Organismal Injury and Abnormalities                                                                   | Recurrent encephalopathy                            | 6,76E-03 |                            |                    | MYC,RHEB,TUBA1A,TUBA1C,TUBB3,TUBB4A                                                     | 6           |
| Cancer,Organismal Injury and Abnormalities,Respiratory Disease                                                             | Unresectable EGFR exon 19 deletion negative non     | 6,76E-03 |                            |                    | PARP2,TUBA1A,TUBA1C,TUBB3,TUBB4A,VEGFA                                                  | 6           |
| Cancer,Organismal Injury and Abnormalities,Respiratory Disease                                                             | Advanced EGFR mutation negative ALK rearrange       | 6,76E-03 |                            |                    | CD274,TUBA1A,TUBA1C,TUBB3,TUBB4A,VEGFA                                                  | 6           |
| Cell-mediated Immune Response,Cellular Development,Cellular Function and Maintenance,Cellular Growth and Survival          | Proliferation of double-negative T lymphocyte       | 6,76E-03 |                            | -0,447             | CDKN1B,HNRNPL,MAP3K14,RASGRP3,RICTOR,TNFAIP3                                            | 6           |
| Cell Death and Survival                                                                                                    | Activation-induced cell death of T-cell hybrid cell | 6,77E-03 |                            | -1,432             | AKT1,DNAJA3,RELA,RORC,TNFAIP3                                                           | 5           |
| Cell Cycle                                                                                                                 | G1/S phase transition of connective tissue cells    | 6,77E-03 |                            | -1                 | Cdc42,CDKN1B,FOXO2,HRAS,RAC1                                                            | 5           |
| Skeletal and Muscular Disorders                                                                                            | Vacuolar myopathy                                   | 6,77E-03 |                            |                    | CASQ1,NBR1,PSMA2,PSMB5,SQSTM1                                                           | 5           |
| Behavior,Nervous System Development and Function                                                                           | Context memory                                      | 6,77E-03 |                            | 1,067              | ACTG1,GADD45G,MAPK8IP1,OGT,QPCT                                                         | 5           |
| Cell Death and Survival                                                                                                    | Apoptosis of breast cancer cell lines               | 6,88E-03 |                            | 1,151              | AGO1,AKT1,ARHGDI1,BAD,BAG3,BCL2L1,BCL2L12,BMX,CASP1,CAT,CAV1,CD274,CKS1B,DNAJA3,EHMT    | 53          |
| Cell Death and Survival                                                                                                    | Apoptosis of melanoma cell lines                    | 6,92E-03 |                            | 1,287              | AKT1S1,BAG3,BCL2L1,CDKN1B,DYNLL1,EIF3F,FBXO11,FOXO3,GADD45G,GBA2,HSPB8,MAP3K5,MAPK1     | 24          |
| Cancer,Organismal Injury and Abnormalities                                                                                 | Benign solid tumor                                  | 7,03E-03 |                            | -1,325             | ADAM12,AIG1,AKAP8L,AKT1,ALDH5A1,ANAPC10,ANGPT1,ANTXR1,ANXA5,ASPN,ATP6V1F,AXIN2,AXL,I    | 151         |
| Cellular Development,Cellular Growth and Proliferation,Hair and Skin Development and Function                              | Proliferation of epithelial cell lines              | 7,19E-03 |                            | -0,859             | ABHD8,ADRA1A,AKAP8L,AKT1,BRCA2,CAT,CDKN1B,CSTF2,EIF3F,FBIN5,FOXO2,FOXO3,FOXO3,GNAI2,H   | 43          |
| Infectious Diseases                                                                                                        | Infection by HIV-1                                  | 7,31E-03 | Decreased                  | -3,745             | ACTR3,AFG3L2,AKT1,ALKBH3,ANKRD6,ASXL2,ATG16L2,ATP6V0A1,BCLAF1,BCR,CAPN6,CCT2,CD164,CL   | 95          |
| Cancer,Organismal Injury and Abnormalities,Reproductive System Disease                                                     | Stage IV advanced breast cancer                     | 7,33E-03 |                            |                    | CD274,CHD1,FKBP1A,PARP2,PARP3,TUBA1A,TUBA1C,TUBB3,TUBB4A,VEGFA                          | 11          |
| Cancer,Endocrine System Disorders,Organismal Injury and Abnormalities,Reproductive System Diseases                         | Advanced HER2 negative hormone receptor positive    | 7,33E-03 |                            |                    | AKT1,CHD1,FKBP1A,PARP2,PARP3,TUBA1A,TUBA1C,TUBB3,TUBB4A,VEGFA                           | 11          |
| Cancer,Hematological Disease,Immunological Disease                                                                         | Lymphoid hyperplasia                                | 7,33E-03 |                            | -0,915             | AKT1,AXL,FOXO3,ICOSLG,LOC102723996,IFNGR1,IL15RA,MALT1,MAP3K14,TCIM,TNFRSF21,TRAF3IP2   | 11          |
| Cancer,Endocrine System Disorders,Organismal Injury and Abnormalities                                                      | Aldosterone producing adrenocortical adenoma        | 7,42E-03 |                            |                    | ALDH5A1,ASPN,BGN,COL6A1,COL6A2,DAD1,DDOST,EFEMP2,FLNC,MGAT1,OSTC,PRELP,RHOC,RPN2,S      | 15          |
| Cell Death and Survival,Skeletal and Muscular Disorders                                                                    | Cell death of muscle cell lines                     | 7,42E-03 |                            | 0,393              | ANGPT1,BAD,BCL2L1,CAV1,EEF1A1,HSPB6,IRF1,LAMP2,NOTCH3,RAC1,SH3BP5,SIVA1,TNFRSF10A,TNF   | 15          |
| Hereditary Disorder,Organismal Injury and Abnormalities,Skeletal and Muscular Disorders                                    | Autosomal dominant myopathy                         | 7,45E-03 |                            |                    | ABCC9,ASPN,BAG3,BGN,CASQ1,CCND3,CELF2,CNBP,COL6A1,COL6A2,CYB561,DDX5,DNM1L,EMD,FLNC     | 39          |
| Cancer,Organismal Injury and Abnormalities                                                                                 | Neoplasia of fibroblast cell lines                  | 7,62E-03 |                            | -0,654             | AFAP1L1,AKT1,BATF2,BRD7,CAV1,Cdc42,DYNLL1,EEF1A1,GNAI2,HNRNPA2B1,HRAS,IRF1,MAP3K8,MAI   | 22          |
| Organ Morphology,Organismal Injury and Abnormalities,Skeletal and Muscular Disorders,Skeletal and Muscular Disorders       | Abnormal morphology of skeletal muscle              | 7,62E-03 |                            |                    | ADAM12,CAV1,Cdkn1c,CFL2,CLIP3,COL6A1,EMD,FLNC,HADHA,Hnrnpa1,HSPB8,ILF3,LMO7,MEOX2,Pt    | 22          |
| Cancer,Organismal Injury and Abnormalities                                                                                 | Carcinoma of unknown primary                        | 7,78E-03 |                            |                    | AKT1,ASXL2,AXIN2,CD274,CHD1,COP1,FLCN,IDH1,MAPK1,MDM4,NOTCH3,SETD2,TET2,TNFAIP3,TUBA    | 19          |
| Metabolic Disease,Organismal Injury and Abnormalities,Renal and Urological Disease                                         | Organic aciduria                                    | 7,87E-03 |                            |                    | DBT,DLD,ETFDH,IDH1,IDH2,IVD,MCCC1,MCCC2,PCCB,PPM1K,SUCLA2,SUGCT                         | 12          |
| Cancer,Organismal Injury and Abnormalities,Respiratory Disease                                                             | Stage I metastatic non-small cell lung carcinoma    | 7,89E-03 |                            |                    | ACTR10,EEF1A1,RHOC,RPL7,RPS11,RPS27A,SSR2                                               | 7           |
| Cancer,Hematological Disease,Immunological Disease,Organismal Injury and Abnormalities                                     | Stage II multiple myeloma                           | 7,89E-03 |                            |                    | IFNAR1,PSMB1,PSMB5,TUBA1A,TUBA1C,TUBB3,TUBB4A                                           | 7           |
| Cancer,Hematological Disease,Immunological Disease,Organismal Injury and Abnormalities                                     | Stage III multiple myeloma                          | 7,89E-03 |                            |                    | IFNAR1,PSMB1,PSMB5,TUBA1A,TUBA1C,TUBB3,TUBB4A                                           | 7           |
| Cancer,Hereditary Disorder,Organismal Injury and Abnormalities                                                             | Primary BRCA2 germline mutation positive perito     | 7,89E-03 |                            |                    | CD274,PARP2,PARP3,TUBA1A,TUBA1C,TUBB3,TUBB4A                                            | 7           |
| Cancer,Organismal Injury and Abnormalities,Respiratory Disease,Tumor Morphology                                            | Stage 4 progressive EGFR sensitizing mutation po    | 7,89E-03 |                            |                    | ATIC,CD274,TUBA1A,TUBA1C,TUBB3,TUBB4A,VEGFA                                             | 7           |
| Cell Morphology,Cellular Function and Maintenance                                                                          | Autophagy of colorectal cancer cell lines           | 7,89E-03 |                            | 0,218              | BCL2L1,CHUK,FOXO1,GABARAPL1,GNAI3,MYC,XBP1                                              | 7           |
| Cancer,Endocrine System Disorders,Hereditary Disorder,Organismal Injury and Abnormalities,Reproductive System Diseases     | BRCA1 germline mutation positive ovarian adeno      | 7,89E-03 |                            |                    | CD274,PARP2,PARP3,TUBA1A,TUBA1C,TUBB3,TUBB4A                                            | 7           |
| Cancer,Hereditary Disorder,Organismal Injury and Abnormalities,Reproductive System Disease                                 | BRCA2 germline mutation positive fallopian tube     | 7,89E-03 |                            |                    | CD274,PARP2,PARP3,TUBA1A,TUBA1C,TUBB3,TUBB4A                                            | 7           |
| Cell Death and Survival                                                                                                    | Cell survival of lung cancer cell lines             | 7,89E-03 |                            | 0,875              | BCL2L1,FBXO5,HTRA3,KBKE,PSMB4,TUBB3,UBE2L3                                              | 7           |
| Cancer,Organismal Injury and Abnormalities,Respiratory Disease                                                             | EGFR activating mutation positive EGFR T790M m      | 7,89E-03 |                            |                    | ATIC,CD274,TUBA1A,TUBA1C,TUBB3,TUBB4A,VEGFA                                             | 7           |
| Cancer,Organismal Injury and Abnormalities                                                                                 | Residual cancer                                     | 7,89E-03 |                            |                    | CD274,PARP2,TUBA1A,TUBA1C,TUBB3,TUBB4A,VEGFA                                            | 7           |
| Cancer,Organismal Injury and Abnormalities,Reproductive System Disease                                                     | Primary HER2 negative hormone receptor negative     | 7,89E-03 |                            |                    | CHD1,PARP2,PARP3,TUBA1A,TUBA1C,TUBB3,TUBB4A                                             | 7           |
| Cancer,Endocrine System Disorders,Organismal Injury and Abnormalities,Reproductive System Diseases                         | Locally advanced HER2-negative breast carcinom      | 7,89E-03 |                            |                    | AKT1,CD274,FKBP1A,TUBA1A,TUBA1C,TUBB3,TUBB4A                                            | 7           |
| Cancer,Neurological Disease,Organismal Injury and Abnormalities                                                            | Diffuse glioma                                      | 7,89E-03 |                            |                    | ALDH5A1,BRCA2,H3-3A/H3-3B,IDH1,IDH2,MAP2K2,VEGFA                                        | 7           |
| Cancer,Organismal Injury and Abnormalities                                                                                 | BRCA1 mutation positive endometrioid cancer         | 7,89E-03 |                            |                    | CD274,PARP2,PARP3,TUBA1A,TUBA1C,TUBB3,TUBB4A                                            | 7           |
| Cancer,Hereditary Disorder,Organismal Injury and Abnormalities,Reproductive System Disease                                 | Invasive familial breast cancer                     | 7,89E-03 |                            |                    | BRCA2,PARP2,PARP3,TUBA1A,TUBA1C,TUBB3,TUBB4A                                            | 7           |
| Cancer,Endocrine System Disorders,Hereditary Disorder,Organismal Injury and Abnormalities,Reproductive System Diseases     | BRCA2 germline mutation positive ovarian adeno      | 7,89E-03 |                            |                    | CD274,PARP2,PARP3,TUBA1A,TUBA1C,TUBB3,TUBB4A                                            | 7           |
| Cancer,Hereditary Disorder,Organismal Injury and Abnormalities                                                             | Primary BRCA1 germline mutation positive perito     | 7,89E-03 |                            |                    | CD274,PARP2,PARP3,TUBA1A,TUBA1C,TUBB3,TUBB4A                                            | 7           |
| Cancer,Organismal Injury and Abnormalities                                                                                 | BRCA2 mutation positive endometrioid cancer         | 7,89E-03 |                            |                    | CD274,PARP2,PARP3,TUBA1A,TUBA1C,TUBB3,TUBB4A                                            | 7           |
| Cancer,Hereditary Disorder,Organismal Injury and Abnormalities,Reproductive System Disease                                 | BRCA1 germline mutation positive fallopian tube     | 7,89E-03 |                            |                    | CD274,PARP2,PARP3,TUBA1A,TUBA1C,TUBB3,TUBB4A                                            | 7           |
| Cardiovascular Disease,Cardiovascular System Development and Function,Organ Morphology,Organismal Injury and Abnormalities | Dilated cardiomyopathy                              | 8,08E-03 |                            |                    | ABCC9,ACE,ACE2,ADRA1A,AIFM1,ATP2A3,BAG3,BCL2L1,BGN,CAPN5,CAV1,CEP85L,CITTA,DAG1,DNM1    | 47          |
| Cancer,Hereditary Disorder,Organismal Injury and Abnormalities,Renal and Urological Disease                                | Hereditary urinary system neoplasm                  | 8,19E-03 |                            |                    | BCL2L1,BRCA2,FLCN,NFE2L2,RHEB,SETD2,SF3B1,TRAP1,VEGFA                                   | 9           |
| Cell Death and Survival                                                                                                    | Cell death of astrocytes                            | 8,19E-03 |                            | -1,179             | BCL2L1,BCL2L12,DNM1L,MAPK1,NFE2L2,PFKFB3,RP56KB2,SH3KBP1,TNFSF10                        | 9           |



| Categories                                                                                        | Diseases or Functions Annotation                     | p-value  | Predicted Activation State | Activation z-score | Molecules                                                                               | # Molecules |
|---------------------------------------------------------------------------------------------------|------------------------------------------------------|----------|----------------------------|--------------------|-----------------------------------------------------------------------------------------|-------------|
| Cancer,Endocrine System Disorders,Organismal Injury and Abnormalities,Reproductive System Disease | Metastatic hormone receptor positive HER2 nega       | 8,19E-03 |                            |                    | AKT1,FKBP1A,PARP2,PARP3,TUBA1A,TUBA1C,TUBB3,TUBB4A,VEGFA                                | 9           |
| Cancer,Organismal Injury and Abnormalities                                                        | Platinum resistant primary peritoneal cancer         | 8,28E-03 |                            |                    | CD274,PARP2,PARP3,TUBA1A,TUBA1C,TUBB3,TUBB4A,VEGFA                                      | 8           |
| Cancer,Organismal Injury and Abnormalities,Reproductive System Disease                            | High grade serous fallopian tube carcinoma           | 8,28E-03 |                            |                    | CD274,PARP2,PARP3,TUBA1A,TUBA1C,TUBB3,TUBB4A,VEGFA                                      | 8           |
| Cancer,Endocrine System Disorders,Organismal Injury and Abnormalities,Reproductive System Disease | Stage III-IV advanced ovarian cancer                 | 8,28E-03 |                            |                    | CD274,PARP2,PARP3,TUBA1A,TUBA1C,TUBB3,TUBB4A,VEGFA                                      | 8           |
| Cancer,Organismal Injury and Abnormalities,Reproductive System Disease                            | Metastatic HER2-negative breast carcinoma            | 8,28E-03 |                            |                    | AKT1,CD274,FKBP1A,TUBA1A,TUBA1C,TUBB3,TUBB4A,VEGFA                                      | 8           |
| Cancer,Organismal Injury and Abnormalities,Reproductive System Disease                            | Clear cell malignant fallopian tube tumor            | 8,28E-03 |                            |                    | CD274,PARP2,PARP3,TUBA1A,TUBA1C,TUBB3,TUBB4A,VEGFA                                      | 8           |
| Cancer,Organismal Injury and Abnormalities                                                        | Clear cell malignant peritoneal tumor                | 8,28E-03 |                            |                    | CD274,PARP2,PARP3,TUBA1A,TUBA1C,TUBB3,TUBB4A,VEGFA                                      | 8           |
| Cell Cycle,Connective Tissue Development and Function                                             | G1 phase of fibroblasts                              | 8,28E-03 |                            | -1,067             | Cdc42,CDKN1B,CRKL,HRAS,MAP3K5,MAPK1,MYC,RAC1                                            | 8           |
| Cancer,Organismal Injury and Abnormalities,Reproductive System Disease                            | HER2 negative hormone receptor negative invasi       | 8,28E-03 |                            |                    | CD274,CHD1,PARP2,PARP3,TUBA1A,TUBA1C,TUBB3,TUBB4A                                       | 8           |
| Cell Morphology                                                                                   | Shape change of cervical cancer cell lines           | 8,28E-03 | Decreased                  | -2,6               | AKT1,GIT2,MAP3K5,MAPRE3,MYADM,PARVA,RAC1,UCLH1                                          | 8           |
| Cancer,Organismal Injury and Abnormalities,Reproductive System Disease                            | Refractory fallopian tube cancer                     | 8,28E-03 |                            |                    | CD274,PARP2,PARP3,TUBA1A,TUBA1C,TUBB3,TUBB4A,VEGFA                                      | 8           |
| Cellular Development,Cellular Growth and Proliferation,Connective Tissue Development and Function | Proliferation of fibroblast cell lines               | 8,31E-03 |                            | -1,282             | ACAT1,ADRA1A,AKT1,AXL,BCL2L1,BRPF1,CAT,CAV1,CD9,CDKN1B,CIRBP,CKS1B,CSNK2B,CSTF2,CXCL10, | 71          |
| Cancer,Organismal Injury and Abnormalities,Reproductive System Disease                            | Hormone receptor positive breast carcinoma           | 8,34E-03 |                            |                    | AKT1,BRCA2,CD274,CHD1,EIF2S2,EIF6,FKBP1A,MAP3K1,PARP2,PARP3,SF3B1,TUBA1A,TUBA1C,TUBB3,  | 16          |
| DNA Replication, Recombination, and Repair                                                        | Transcription-coupled nucleotide-excision repair     | 8,36E-03 |                            |                    | CUL4A,DDB1,ERCC1,ERCC2,ERCC5,ERCC6,POLD3,POLR2D,POLR2G,POLR2I,RF1,RPS27A,TCEA1,UVSSA    | 14          |
| Cancer,Organismal Injury and Abnormalities,Reproductive System Disease                            | Fallopian tube cancer                                | 8,36E-03 |                            |                    | ANGPT1,ATIC,BRCA2,CD274,CHD1,MAP2K2,MAPK1,PARP2,PARP3,TUBA1A,TUBA1C,TUBB3,TUBB4A,VF     | 14          |
| Cell Death and Survival                                                                           | Cell death of lung cancer cell lines                 | 8,40E-03 |                            | 0,455              | AIFM1,AKT1,ATAD2,ATP1B3,AXL,BCL2L1,BRCA2,CASP1,CAV1,CCAR2,CCP110,CD274,CDKN1B,CLPTM11   | 48          |
| Cell Cycle                                                                                        | G0/G1 phase transition                               | 8,40E-03 |                            |                    | BAD,BCL2L1,CAV1,CDKN1B,FOXO3,HRAS,MAP3K5,MEOX2,MYC,RAC1,RACK1,RRX,SDC2,STAT1,THRB       | 15          |
| Developmental Disorder,Endocrine System Disorders,Hereditary Disorder,Organismal Injury and Abnc  | Klinefelter syndrome                                 | 8,40E-03 |                            |                    | FLNA,GSTM2,GTPBP6,ITGB3,LAMB2,MAP1A,MVB12B,PIK3R3,PKHD1L1,SMC1A,TXLNG,UBA1,USP31,W      | 15          |
| Cell Morphology,Organ Morphology,Skeletal and Muscular System Development and Function,Tissue     | Size of muscle cells                                 | 8,50E-03 |                            |                    | ACE,ADRA1A,AKT1,CAPNS1,Cdkn1c,FLNC,FOXO1,FOXO3,FTO,HRAS,LIMS1,MAP3K1,MEOX2,MYC,NPR1     | 25          |
| Developmental Disorder,Embryonic Development,Organismal Development,Tissue Morphology             | Lack of mesoderm                                     | 8,61E-03 |                            |                    | BMPR2,DAG1,DHX9,DRAP1,PPP2CA,RAC1,SMAD4,SRF,TRIM28,UBIAD1,WLS                           | 11          |
| Cancer,Organismal Injury and Abnormalities                                                        | High grade recurrent primary peritoneal serous a     | 8,67E-03 |                            |                    | CD274,PARP2,PARP3,VEGFA                                                                 | 4           |
| Cancer,Organismal Injury and Abnormalities                                                        | High grade primary recurrent peritoneal cancer       | 8,67E-03 |                            |                    | CD274,PARP2,PARP3,VEGFA                                                                 | 4           |
| Cancer,Endocrine System Disorders,Hereditary Disorder,Organismal Injury and Abnormalities,Reprod  | Familial epithelial ovarian cancer                   | 8,67E-03 |                            |                    | BRCA2,PARP2,PARP3,VEGFA                                                                 | 4           |
| Cellular Assembly and Organization                                                                | Formation of membrane rafts                          | 8,67E-03 |                            |                    | CAV1,Cdc42,RAC1,TNFSF10                                                                 | 4           |
| Cancer,Organismal Injury and Abnormalities,Tumor Morphology                                       | High grade progressive peritoneal serous cancer      | 8,67E-03 |                            |                    | CD274,PARP2,PARP3,VEGFA                                                                 | 4           |
| Organ Morphology,Organismal Injury and Abnormalities,Skeletal and Muscular Disorders,Skeletal anc | Abnormal morphology of intercostal muscle            | 8,67E-03 |                            |                    | COL6A1,FLNC,Hmnpa1,ILF3                                                                 | 4           |
| Cancer,Organismal Injury and Abnormalities,Reproductive System Disease,Tumor Morphology           | Progressive endometrioid fallopian tube cancer       | 8,67E-03 |                            |                    | CD274,PARP2,PARP3,VEGFA                                                                 | 4           |
| Cancer,Organismal Injury and Abnormalities,Tumor Morphology                                       | Progressive endometrioid peritoneal cancer           | 8,67E-03 |                            |                    | CD274,PARP2,PARP3,VEGFA                                                                 | 4           |
| Cell Death and Survival                                                                           | Apoptosis of schwannoma cell lines                   | 8,84E-03 |                            |                    | MYC,TNFRSF10A,TNFSF10                                                                   | 3           |
| Cell-To-Cell Signaling and Interaction                                                            | Adhesion of E. coli                                  | 8,84E-03 |                            |                    | CD151,CD63,CD9                                                                          | 3           |
| Carbohydrate Metabolism                                                                           | Metabolism of fructose-2,6-diphosphate               | 8,84E-03 |                            |                    | PFKFB1,PFKFB2,PFKFB3                                                                    | 3           |
| Cell-To-Cell Signaling and Interaction,Embryonic Development                                      | Adhesion of embryonic stem cells                     | 8,84E-03 |                            |                    | CD9,ITGA5,SRF                                                                           | 3           |
| Cell-To-Cell Signaling and Interaction                                                            | Breakdown of intercellular junctions                 | 8,84E-03 |                            |                    | CRKL,ITGA5,RAC1                                                                         | 3           |
| Connective Tissue Development and Function,Embryonic Development,Organ Morphology,Organism        | Length of humerus                                    | 8,84E-03 |                            |                    | Cdc42,GPC6,SMO                                                                          | 3           |
| Cardiovascular Disease,Cardiovascular System Development and Function,Organ Morphology,Organis    | Abnormal morphology of myocardial cuff               | 8,84E-03 |                            |                    | AKT1,CDKN1B,EMD                                                                         | 3           |
| Carbohydrate Metabolism                                                                           | Quantity of fructose-2,6-diphosphate                 | 8,84E-03 |                            |                    | PFKFB1,PFKFB2,PFKFB3                                                                    | 3           |
| Infectious Diseases                                                                               | Infection of fibrosarcoma cell lines                 | 8,84E-03 |                            |                    | AXL,STAT1,STAT2                                                                         | 3           |
| Cardiovascular System Development and Function                                                    | Proliferation of blood vessel                        | 8,84E-03 |                            |                    | AKT1,FOXO1,PF4                                                                          | 3           |
| Developmental Disorder,Hereditary Disorder,Metabolic Disease,Organismal Injury and Abnormalities, | Maple syrup urine disease                            | 8,84E-03 |                            |                    | DBT,DLD,PPM1K                                                                           | 3           |
| Cell Morphology                                                                                   | Elongation of embryonic cell lines                   | 8,84E-03 |                            |                    | CAV1,Cdc42,RAC1                                                                         | 3           |
| Carbohydrate Metabolism,Small Molecule Biochemistry                                               | Catabolism of D-glucose                              | 8,84E-03 |                            |                    | BAD,MYC,PFKFB2                                                                          | 3           |
| Cancer,Organismal Injury and Abnormalities,Tumor Morphology                                       | Progression of adenoma                               | 8,84E-03 |                            |                    | FOXO1,FOXO3,TSC1                                                                        | 3           |
| Cell-To-Cell Signaling and Interaction                                                            | Binding of Escherichia coli 25922                    | 8,84E-03 |                            |                    | CD151,CD63,CD9                                                                          | 3           |
| Amino Acid Metabolism,Small Molecule Biochemistry                                                 | Catabolism of leucine                                | 8,84E-03 |                            |                    | IVD,MCCC1,MCCC2                                                                         | 3           |
| Developmental Disorder,Neurological Disease,Ophthalmic Disease,Organismal Injury and Abnormaliti  | Congenital fibrosis of extraocular muscles           | 8,84E-03 |                            |                    | KIF21A,TUBA1A,TUBB3                                                                     | 3           |
| Cardiovascular Disease,Organismal Injury and Abnormalities                                        | Rupture of aorta                                     | 8,84E-03 |                            |                    | BGN,EFEEMP2,LTBP3                                                                       | 3           |
| Cell Cycle                                                                                        | Delay in initiation of G0/G1 phase transition        | 8,84E-03 |                            |                    | BAD,BCL2L1,STAT1                                                                        | 3           |
| Cellular Assembly and Organization,Cellular Function and Maintenance                              | Regrowth of microtubules                             | 8,84E-03 |                            |                    | CLIP3,MAPRE1,TBCB                                                                       | 3           |
| Developmental Disorder,Hereditary Disorder,Metabolic Disease,Neurological Disease,Organismal Inju | Intellectual disability and inborn errors of metab   | 8,84E-03 |                            |                    | DLD,ERCC6,PDHX                                                                          | 3           |
| Carbohydrate Metabolism,Small Molecule Biochemistry                                               | Metabolism of isocitric acid                         | 8,84E-03 |                            |                    | IDH1,IDH3B,IDH3G                                                                        | 3           |
| Small Molecule Biochemistry                                                                       | Concentration of fructose-2,6-diphosphate            | 8,84E-03 |                            |                    | HRAS,PFKFB2,PFKFB3                                                                      | 3           |
| Cellular Development                                                                              | Epithelial-mesenchymal transition of liver cell line | 8,84E-03 |                            |                    | BTBD7,FTH1,SMAD4                                                                        | 3           |
| Cell Death and Survival,Skeletal and Muscular Disorders                                           | Necrosis of muscle                                   | 9,01E-03 |                            | 1,454              | ABCC9,ACE2,ADAM12,ADRA1A,AKT1,ANGPT1,ATP2B4,BAD,BAG3,BCL2L1,BRCA2,C1QTNF9B,CASP1,CA     | 57          |
| Cancer,Organismal Injury and Abnormalities,Respiratory Disease                                    | Recurrent metastatic non-squamous non-small o        | 9,05E-03 |                            |                    | ATIC,TUBA1A,TUBA1C,TUBB3,TUBB4A,VEGFA                                                   | 6           |
| Cell Cycle,Hair and Skin Development and Function                                                 | G2 phase of epithelial cell lines                    | 9,05E-03 |                            |                    | MYC,OGT,PPP2CA,PPP2CB,RASSF1,RBBP6                                                      | 6           |
| Cancer,Organismal Injury and Abnormalities,Respiratory Disease                                    | Unresectable EGFR sensitizing mutation positive i    | 9,05E-03 |                            |                    | CD274,TUBA1A,TUBA1C,TUBB3,TUBB4A,VEGFA                                                  | 6           |
| Cancer,Organismal Injury and Abnormalities                                                        | Squamous cell carcinoma of unknown primary           | 9,05E-03 |                            |                    | CD274,TUBA1A,TUBA1C,TUBB3,TUBB4A,VEGFA                                                  | 6           |
| RNA Post-Transcriptional Modification                                                             | Processing of RNA                                    | 9,08E-03 |                            | -0,342             | AGO2,AKAP8L,C1D,CCAR2,CDK13,CELF2,CLK1,CLK2,CLK4,CPSF1,CSTF2,DDX23,DDX41,DDX5,DHX9,EMC  | 66          |
| Infectious Diseases                                                                               | Infection by RNA virus                               | 9,29E-03 | Decreased                  | -4,622             | ACE,ACE2,ACTR3,ADRA1A,AFG3L2,AHSG,AKT1,ALKBH3,ANKRD6,AP2A1,APOBEC3B,ARHGAP12,ASKL2,.    | 167         |
| Cell Death and Survival                                                                           | Cell viability of tumor cell lines                   | 9,40E-03 |                            | -1,136             | ACE,ACVRL1,ADRM1,AGO2,AIFM1,AKAP8L,AKT1,ALKBH3,AMFR,ANAPC11,ANTXR1,ATF5,AXL,BAD,BAG     | 157         |
| Metabolic Disease,Organismal Injury and Abnormalities,Renal and Urological Disease                | Aciduria                                             | 9,51E-03 |                            |                    | ACADL,DBT,DLD,ETFDH,IDH1,IDH2,IVD,LDHD,MCCC1,MCCC2,PCCB,PPM1K,SUCLA2,SUGCT              | 14          |
| Hereditary Disorder,Organismal Injury and Abnormalities                                           | Turner syndrome                                      | 9,54E-03 |                            |                    | GRIPAP1,GSTM2,GTPBP6,ITGB3,LAMB2,MAGEE1,MAP1A,MVB12B,PIK3R3,PKHD1L1,PRAF2,RTL8C,SH3     | 19          |
| Cardiovascular Disease,Cardiovascular System Development and Function,Developmental Disorder,O    | Interrupted aortic arch                              | 9,66E-03 |                            |                    | BMPR2,CRKL,FLNA,FOXC2,VEGFA                                                             | 5           |
| Cancer,Organismal Injury and Abnormalities                                                        | Stage I-II cancer                                    | 9,82E-03 |                            |                    | ACTR10,AGO1,AGO2,ATIC,CD274,CHD1,CYP1B1,EEF1A1,FKBP1A,IFNAR1,IL2RG,CLK10,LAMC2,MAP2K2   | 29          |
| Cancer,Organismal Injury and Abnormalities,Reproductive System Disease                            | Multifocal breast cancer                             | 9,88E-03 |                            |                    | CD274,CHD1,FKBP1A,PARP2,PARP3,TUBA1A,TUBA1C,TUBB3,TUBB4A                                | 9           |
| Cancer,Organismal Injury and Abnormalities,Reproductive System Disease                            | Metastatic castration resistant prostatic adenoca    | 9,88E-03 |                            |                    | AKT1,AXL,CD274,PARP2,PARP3,TUBA1A,TUBA1C,TUBB3,TUBB4A                                   | 9           |

| Categories                                                                                                              | Diseases or Functions Annotation                  | p-value  | Predicted Activation State | Activation z-score | Molecules                                                                              | # Molecules |
|-------------------------------------------------------------------------------------------------------------------------|---------------------------------------------------|----------|----------------------------|--------------------|----------------------------------------------------------------------------------------|-------------|
| Cancer,Organismal Injury and Abnormalities                                                                              | Cystadenocarcinoma                                | 9,88E-03 |                            |                    | DYNLRB1,HRAS,PPP2R1A,RPS19,TUBA1A,TUBA1C,TUBB3,TUBB4A,VEGFA                            | 9           |
| Cancer,Organismal Injury and Abnormalities,Reproductive System Disease                                                  | Refractory breast cancer                          | 9,88E-03 |                            |                    | CD274,CHD1,FKBP1A,PARP2,PARP3,TUBA1A,TUBA1C,TUBB3,TUBB4A                               | 9           |
| Cancer,Organismal Injury and Abnormalities                                                                              | BRCA1 mutation positive carcinoma                 | 9,88E-03 |                            |                    | ATIC,CD274,PARP2,PARP3,TUBA1A,TUBA1C,TUBB3,TUBB4A,VEGFA                                | 9           |
| Cancer,Organismal Injury and Abnormalities,Reproductive System Disease                                                  | Metastatic cervical neoplasm                      | 9,88E-03 |                            |                    | ALDH5A1,AOC3,ATIC,CD274,TUBA1A,TUBA1C,TUBB3,TUBB4A,VEGFA                               | 9           |
| Cancer,Organismal Injury and Abnormalities,Respiratory Disease                                                          | Stage IV metastatic non-squamous non-small cell   | 9,88E-03 |                            |                    | ATIC,CD274,PARP2,PARP3,TUBA1A,TUBA1C,TUBB3,TUBB4A,VEGFA                                | 9           |
| Developmental Disorder,Hereditary Disorder,Organismal Injury and Abnormalities,Skeletal and Muscular Disorders          | Duchenne muscular dystrophy                       | 9,90E-03 |                            |                    | ACE,ADRA1A,ASPN,BGN,CELF2,COL6A1,COL6A2,CYB561,HLA-A,LOXL1,LTBP3,PKP2,PLOD2,RASSF1,SDC | 18          |
| Cell Cycle                                                                                                              | Senescence of cells                               | 9,90E-03 |                            | 1,1                | AKT1,ARHGAP18,BCL2L1,BCL2L12,BRD7,BUB3,CAT,CAV1,CDKN1B,CIRBP,CKS1B,DPY30,ERCC1,Ewsr1,F | 55          |
| Cancer,Organismal Injury and Abnormalities,Reproductive System Disease                                                  | HER2 negative hormone receptor positive invasiv   | 1,00E-02 |                            |                    | CHD1,PARP2,PARP3,TUBA1A,TUBA1C,TUBB3,TUBB4A                                            | 7           |
| Connective Tissue Disorders,Organismal Injury and Abnormalities,Skeletal and Muscular Disorders                         | Osteosclerosis                                    | 1,00E-02 |                            | 1,432              | ERCC2,IDS,ITGB3,LTBP3,POLR3B,THRA,THRB                                                 | 7           |
| Cell Cycle                                                                                                              | Quiescence of blood cells                         | 1,00E-02 | Increased                  | 2,599              | CDKN1B,CKS1B,Meis1,MYC,TNFAIP3,TSC1,XRCC6                                              | 7           |
| Cancer,Organismal Injury and Abnormalities,Reproductive System Disease                                                  | Recurrent HER2 negative hormone receptor posit    | 1,00E-02 |                            |                    | AKT1,FKBP1A,TUBA1A,TUBA1C,TUBB3,TUBB4A,VEGFA                                           | 7           |
| Cell Cycle                                                                                                              | Exit from interphase                              | 1,00E-02 |                            |                    | CAV1,CDKN1B,CSNK2B,FOXO3,MYC,RASSF1,RBM5                                               | 7           |
| Metabolic Disease,Neurological Disease,Organismal Injury and Abnormalities,Skeletal and Muscular Disorders              | Mitochondrial encephalomyopathy                   | 1,01E-02 |                            |                    | AIFM1,COX15,DLD,GOLPH3,IARS2,LRPPRC,MRPL3,MTFMT,NDUFS1,SCO1,SURF1                      | 11          |
| Cancer,Organismal Injury and Abnormalities,Reproductive System Disease                                                  | HER2 negative hormone receptor positive invasiv   | 1,02E-02 |                            |                    | CHD1,FKBP1A,PARP2,PARP3,TUBA1A,TUBA1C,TUBB3,TUBB4A                                     | 8           |
| Cancer,Organismal Injury and Abnormalities,Reproductive System Disease                                                  | Hormone receptor positive metastatic breast car   | 1,02E-02 |                            |                    | AKT1,CD274,FKBP1A,TUBA1A,TUBA1C,TUBB3,TUBB4A,VEGFA                                     | 8           |
| Cancer,Organismal Injury and Abnormalities,Reproductive System Disease                                                  | Stage IV estrogen receptor negative invasive brea | 1,02E-02 |                            |                    | CD274,CHD1,TUBA1A,TUBA1C,TUBB3,TUBB4A,VEGFA                                            | 8           |
| Embryonic Development,Organismal Development,Tissue Morphology                                                          | Morphology of ectoderm                            | 1,02E-02 |                            |                    | CR1L,DAG1,IL11RA,MAPK1,PIKFYVE,PTGIS,RAB10,SMAD4                                       | 8           |
| Cancer,Organismal Injury and Abnormalities,Reproductive System Disease                                                  | Metastatic breast adenocarcinoma                  | 1,02E-02 |                            |                    | AKT1,CD274,FKBP1A,TUBA1A,TUBA1C,TUBB3,TUBB4A,VEGFA                                     | 8           |
| Cancer,Organismal Injury and Abnormalities,Reproductive System Disease                                                  | Primary invasive breast adenocarcinoma            | 1,02E-02 |                            |                    | CHD1,PARP2,PARP3,RASSF1,TUBA1A,TUBA1C,TUBB3,TUBB4A                                     | 8           |
| Gastrointestinal Disease,Hepatic System Disease,Organismal Injury and Abnormalities                                     | Degeneration of liver                             | 1,02E-02 |                            | -0,053             | AXL,CHUK,ERCC1,GIMAP1-GIMAP5,Mt2,PHYH,RELA,TBK1                                        | 8           |
| Cancer,Connective Tissue Disorders,Organismal Injury and Abnormalities,Skeletal and Muscular Disorders                  | Chondroma in phalanx                              | 1,02E-02 |                            |                    | IDH1,IDH2                                                                              | 2           |
| Endocrine System Disorders,Metabolic Disease,Organismal Injury and Abnormalities                                        | Acquired childhood hypothyroidism                 | 1,02E-02 |                            |                    | THRA,THRB                                                                              | 2           |
| Developmental Disorder,Hereditary Disorder,Neurological Disease,Organismal Injury and Abnormalities                     | Cerebrooculofacioskeletal syndrome 1              | 1,02E-02 |                            |                    | ERCC2,ERCC6                                                                            | 2           |
| Cell Death and Survival                                                                                                 | Apoptosis of cortical astrocytes                  | 1,02E-02 |                            |                    | BCL2L12,NFE2L2                                                                         | 2           |
| Developmental Disorder,Hereditary Disorder,Neurological Disease,Organismal Injury and Abnormalities                     | Chromosome 9q subtelomeric deletion syndrome      | 1,02E-02 |                            |                    | ABCC9,EHMT1                                                                            | 2           |
| Cell Cycle,Hair and Skin Development and Function                                                                       | Arrest in G2/M phase transition of keratinocytes  | 1,02E-02 |                            |                    | MAP3K5,MYC                                                                             | 2           |
| Cancer,Connective Tissue Disorders,Organismal Injury and Abnormalities,Skeletal and Muscular Disorders                  | Chondrosarcoma in femur                           | 1,02E-02 |                            |                    | IDH1,IDH2                                                                              | 2           |
| Connective Tissue Disorders,Dermatological Diseases and Conditions,Developmental Disorder,Hereditary Disorder           | Autosomal recessive cutis laxa type 1A            | 1,02E-02 |                            |                    | EFEMP2,FBLN5                                                                           | 2           |
| Cell Death and Survival                                                                                                 | Apoptosis of duct cancer cell lines               | 1,02E-02 |                            |                    | SMO,TNFSF10                                                                            | 2           |
| Developmental Disorder,Hereditary Disorder,Metabolic Disease,Organismal Injury and Abnormalities                        | 3-methylcrotonyl-CoA carboxylase 1 deficiency     | 1,02E-02 |                            |                    | MCCC1,MCCC2                                                                            | 2           |
| Cancer,Connective Tissue Disorders,Organismal Injury and Abnormalities,Skeletal and Muscular Disorders                  | Chondrosarcoma in humerus                         | 1,02E-02 |                            |                    | IDH1,IDH2                                                                              | 2           |
| Cell Cycle                                                                                                              | Arrest in G2/M phase of pancreatic duct cells     | 1,02E-02 |                            |                    | PPP2CA,PPP2CB                                                                          | 2           |
| Cell Death and Survival,Connective Tissue Disorders,Organismal Injury and Abnormalities,Skeletal and Muscular Disorders | Apoptosis of articular chondrocytes               | 1,02E-02 |                            |                    | SETDB1,TNFSF10                                                                         | 2           |
| Cancer,Connective Tissue Disorders,Organismal Injury and Abnormalities,Skeletal and Muscular Disorders                  | Chondrosarcoma in bone                            | 1,02E-02 |                            |                    | IDH1,IDH2                                                                              | 2           |
| Endocrine System Disorders,Metabolic Disease,Organismal Injury and Abnormalities                                        | Acquired secondary hypothyroidism                 | 1,02E-02 |                            |                    | THRA,THRB                                                                              | 2           |
| Endocrine System Disorders,Metabolic Disease,Organismal Injury and Abnormalities                                        | Acquired primary hypothyroidism                   | 1,02E-02 |                            |                    | THRA,THRB                                                                              | 2           |
| Cell Cycle                                                                                                              | Arrest in G1 phase of fibrosarcoma cell lines     | 1,02E-02 |                            |                    | MAP3K5,RABL6                                                                           | 2           |
| Endocrine System Disorders,Metabolic Disease,Organismal Injury and Abnormalities                                        | Acquired tertiary hypothyroidism                  | 1,02E-02 |                            |                    | THRA,THRB                                                                              | 2           |
